# Supplementary material for: Visualization of the protein corona: towards a biomolecular understanding of nanoparticle-cell-interactions
Source: Royal Society of Chemistry journal article supplement (doi:10.1039/c7nr02977b), 2017-01-01
Supplement: c7nr02977b1.pdf [file c7nr02977b1.pdf]

## Supporting Information

### Visualization of the Protein Corona: towards a biomolecular understanding of nanoparticle-cell- interactions

*Authors:* Maria Kokkinopoulou<sup>†1</sup>, Johanna Simon<sup>†1</sup>, Katharina Landfester<sup>1</sup>, Volker Mailänder<sup>\*2</sup>,  
Ingo Lieberwirth<sup>\*1</sup>

<sup>1</sup>Max Planck-Institute for Polymer Research, Ackermannweg 10, 55128 Mainz, Germany

<sup>2</sup>Clinic of Dermatology, University Medicine Mainz, Langenbeckstraße 1, 55131 Mainz, Germany

<sup>†</sup> both authors contributed equally

<sup>\*</sup> Corresponding author

Corresponding Authors: Volker Mailänder: [volker.mailaender@unimedizin-mainz.de](mailto:volker.mailaender@unimedizin-mainz.de)

Ingo Lieberwirth: [lieberw@mpip-mainz.mpg.de](mailto:lieberw@mpip-mainz.mpg.de)

# Contents

|                                                                                               |                                           |
|-----------------------------------------------------------------------------------------------|-------------------------------------------|
| Physicochemical properties of nanoparticles .....                                             | 3                                         |
| Visualizing protein nanoparticle interactions by electron microscopy .....                    | 3                                         |
| Monitoring the protein corona with dynamic light scattering.....                              | 5                                         |
| Quantification of adsorbed proteins and remaining content of proteins in the supernatant..... | 8                                         |
| Classification of corona proteins .....                                                       | 9                                         |
| Cellular interactions of protein corona coated nanoparticles .....                            | 12                                        |
| Methods .....                                                                                 | <b>Fehler! Textmarke nicht definiert.</b> |
| Nanoparticle Synthesis .....                                                                  | <b>Fehler! Textmarke nicht definiert.</b> |
| LC MS Analysis .....                                                                          | 15                                        |
| Literature .....                                                                              | 29                                        |

## Physicochemical properties of nanoparticles

**Table 1:** Physicochemical properties as hydrodynamic radius and  $\zeta$ -potential of polystyrene nanoparticles determined by multi angle dynamic light scattering in aqueous solution and PBS. The fluorescence intensity of the BODIPY labeled nanoparticles (525/535 nm) was determined by Tecan Microplate Reader and normalized to the value for un-functionalized polystyrene nanoparticles.

|                     | $R_h$ (H <sub>2</sub> O) | $R_h$ (PBS)     | $\zeta$ -Potential | Fluorescence Intensity Factor |
|---------------------|--------------------------|-----------------|--------------------|-------------------------------|
| PS                  | $73 \pm 7.3$ nm          | $75 \pm 7.5$ nm | - 3.70 mV          | 1                             |
| PS- COOH            | $70 \pm 7.0$ nm          | $72 \pm 7.0$ nm | - 7.21 mV          | 1.16                          |
| PS- NH <sub>2</sub> | $74 \pm 4.3$ nm          | $79 \pm 7.9$ nm | + 7.58 mV          | 1.05                          |

## Visualizing protein nanoparticle interactions by electron microscopy

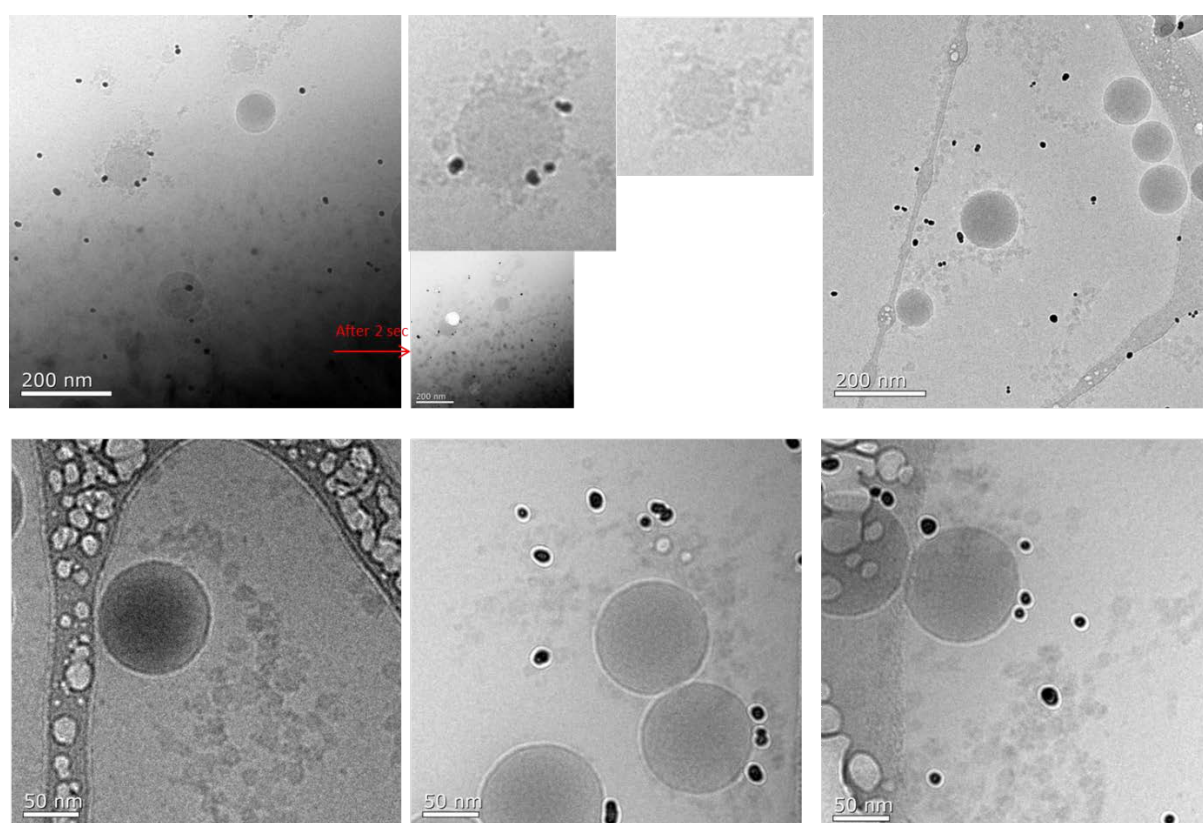

**Figure 1:** Cryo-TEM micrographs of un-functionalized PS nanoparticles incubated with gold-labelled bovine serum albumin visualize the structure of the protein corona. Nanoparticles ( $0.05 \mu\text{m}^2$ ) were incubated with  $100 \mu\text{g}$  of protein for 1h at  $37^\circ\text{C}$  before measurements were performed.

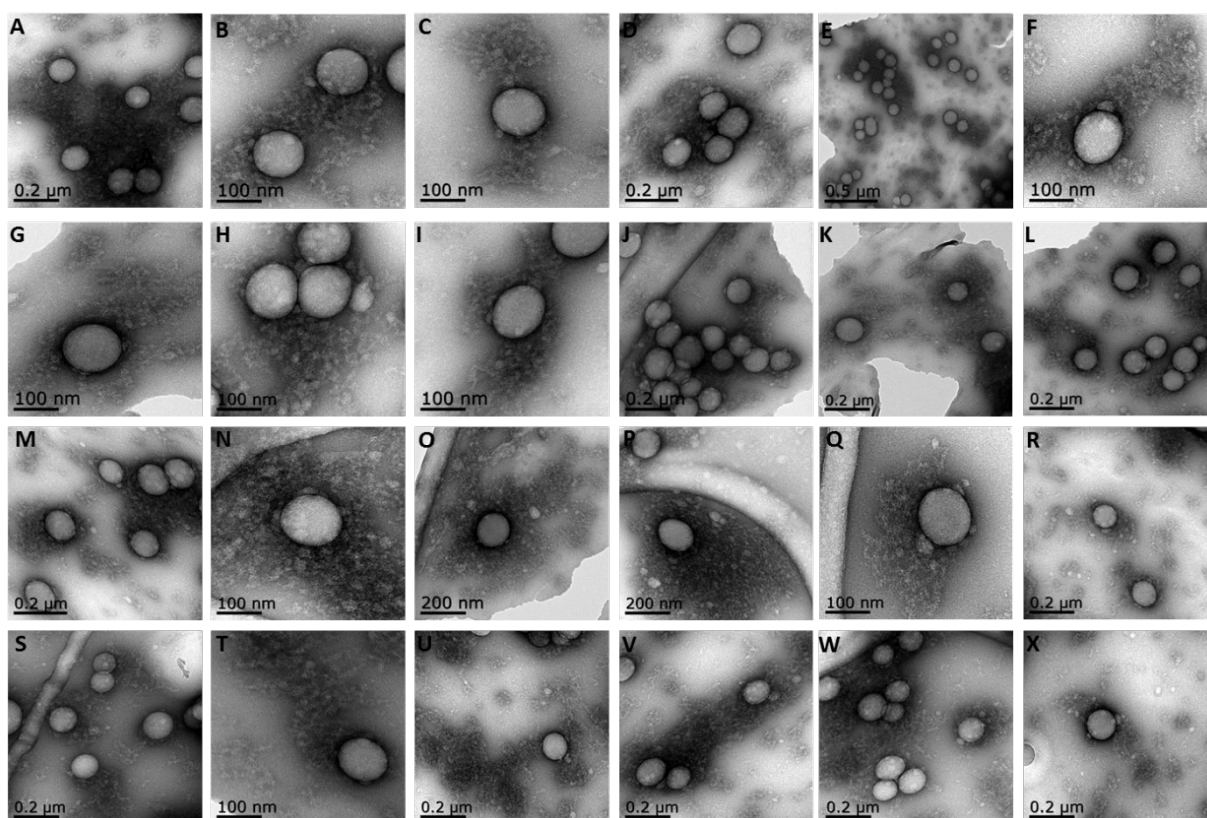

**Figure 2:** TEM micrographs of un-functionalized PS nanoparticles incubated with human serum and centrifuged once (A). Nanoparticles are surrounded by a huge protein cloud.

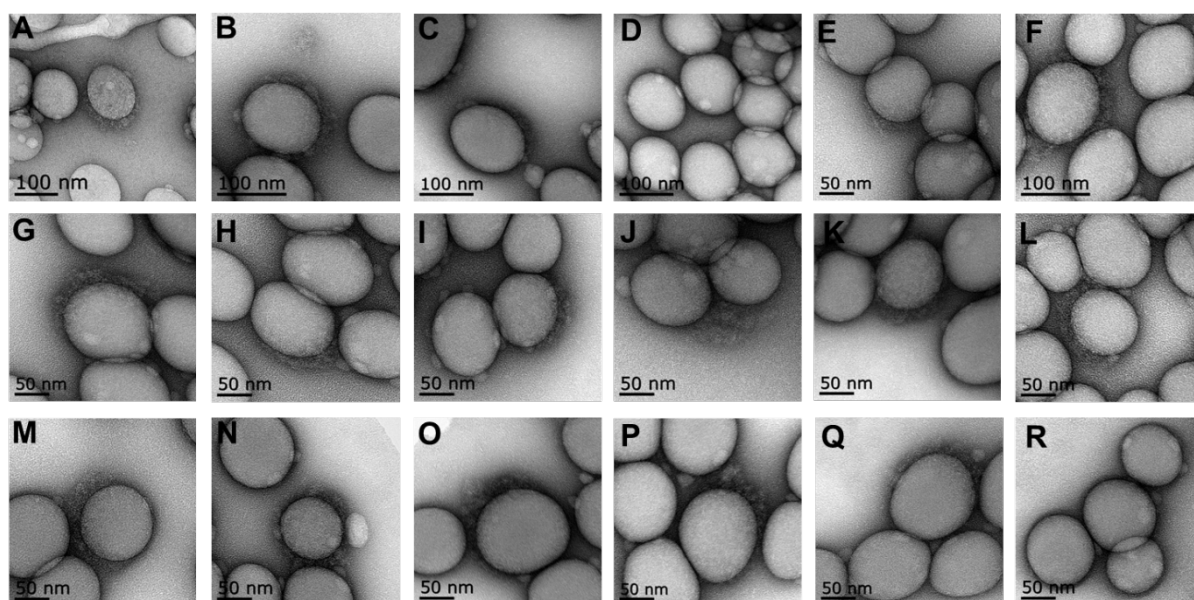

**Figure 3:** TEM micrographs of un-functionalized PS nanoparticles incubated with human serum centrifuged and washed three times (D). The hard protein corona surrounding nanoparticles is visualized.

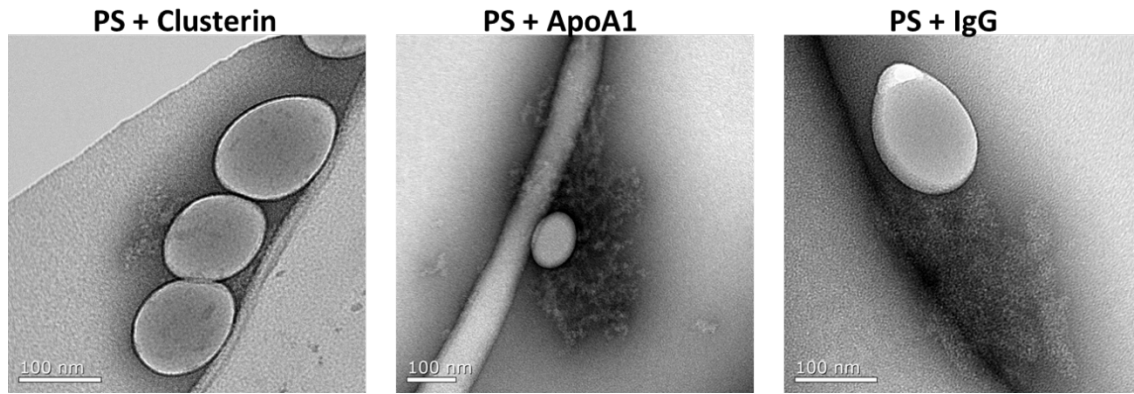

**Figure 4:** TEM micrographs of un-functionalized PS incubated with identified hard corona proteins. Nanoparticles ( $0.05 \text{ m}^2$ ) were incubated with  $100 \text{ }\mu\text{g}$  of protein for 1h at  $37^\circ\text{C}$  before measurements were performed.

## Monitoring the protein corona with dynamic light scattering

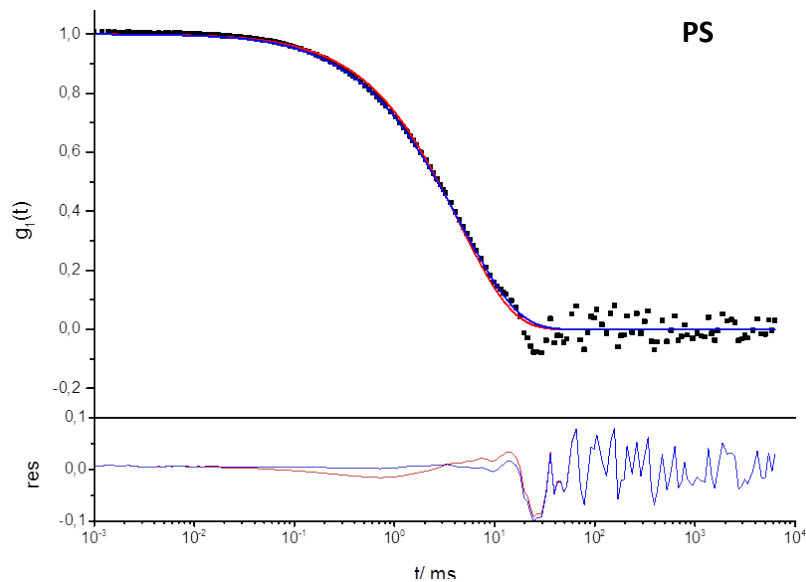

**Figure 5:** Autocorrelation function of un-functionalized PS nanoparticles incubated with human serum exemplary shown for a scattering angle of  $30^\circ$ . *Upper graph:* The blue line (—) represents the forced fit composed of the sum of the individual components whereas the red line (—) represents the fit with an additional aggregation function. *Lower graph:* Corresponding residuals resulting from the difference between the data and the two fits. The overlay of the red and blue fit indicates that there is no significant aggregation of un-functionalized PS nanoparticles incubated with human serum. Strong aggregation formation of nanoparticles in human serum would result in a great shift between the addition aggregation function (red) and the forced fit (blue).

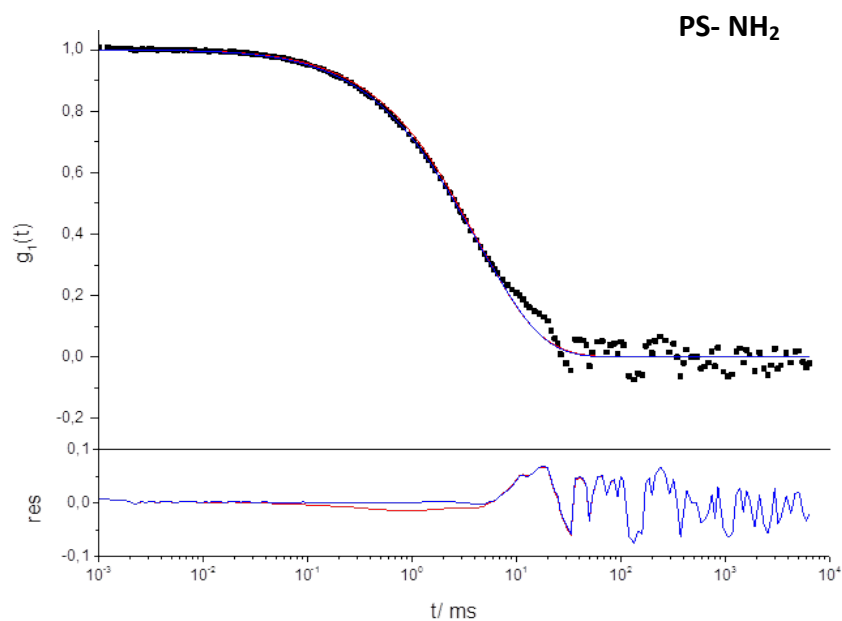

**Figure 6:** Autocorrelation function of PS -NH<sub>2</sub> nanoparticles incubated with human serum exemplary shown for a scattering angle of 30°. *Upper graph:* The blue line (–) represents the forced fit composed of the sum of the individual components whereas the red line (–) represents the fit with an additional aggregation function. *Lower graph:* Corresponding residuals resulting from the difference between the data and the two fits. The overlay of the red and blue fit indicates that there is no significant aggregation of PS- NH<sub>2</sub> nanoparticles incubated with human serum.

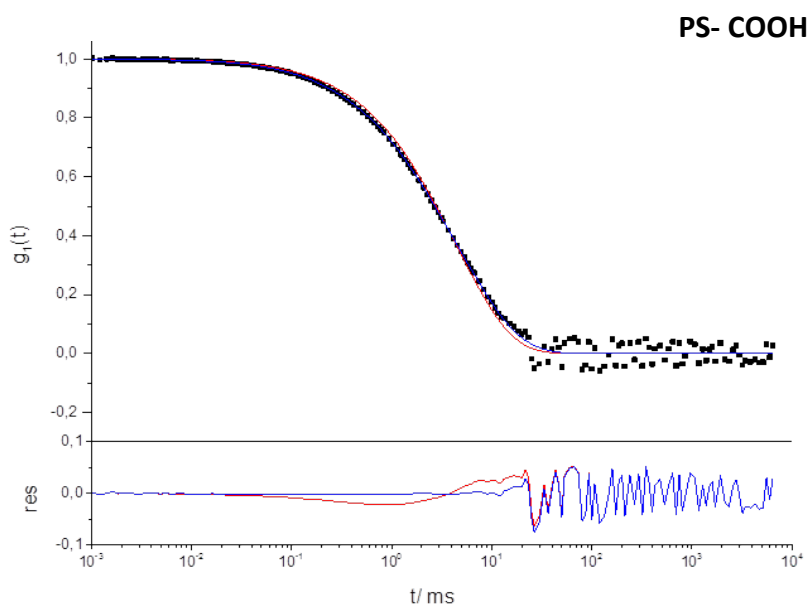

**Figure 7:** Autocorrelation function of PS- COOH nanoparticles incubated with human serum exemplary shown for a scattering angle of 30°. *Upper graph:* The blue line (–) represents the forced fit composed of the sum of the individual components whereas the red line (–) represents the fit with an additional aggregation function. *Lower graph:* Corresponding residuals resulting from the difference between the data and the two fits. The overlay of the red and blue fit indicates that there is no significant aggregation of PS- COOH nanoparticles incubated with human serum.

**Table 2:** *Soft corona* hydrodynamic radii of polystyrene nanoparticles incubated within human serum measured by multi angle dynamic light scattering. The size of the nanoparticles was measured directly within human serum. Nanoparticles are surrounded by a huge protein causing a size increase. Values are exemplary given for a scattering angle at 30° as the system has the greatest sensitivity towards detection of aggregation formation.<sup>1</sup>

|                     | Hydrodynamic radius (NP with <i>soft corona</i> )<br>(Scattering angle 30°) | Intensity<br>(I%) |
|---------------------|-----------------------------------------------------------------------------|-------------------|
| PS                  | 140 ± 14 nm                                                                 | 22                |
| PS- COOH            | 178 ± 18 nm                                                                 | 21                |
| PS- NH <sub>2</sub> | 188 ± 19 nm                                                                 | 18                |

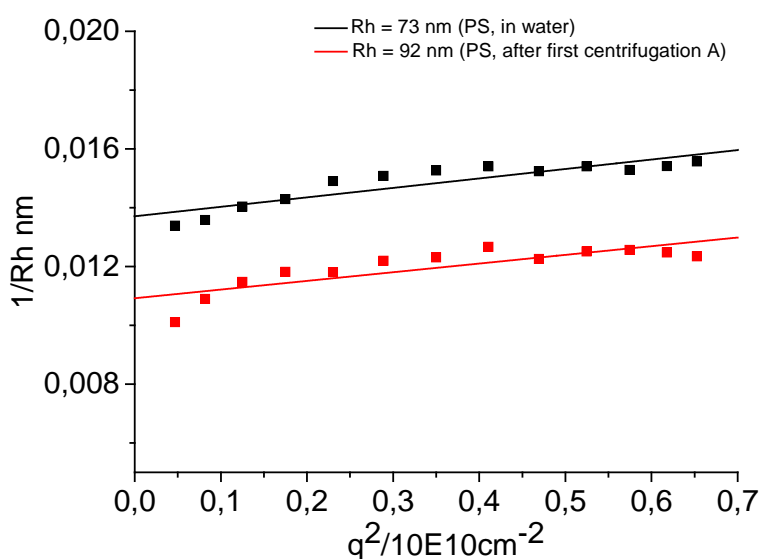

**Figure 8:** Incubation of un-functionalized PS with human serum and further centrifugation to isolate NPs with hard protein corona (PS; A) in comparison to PS in water. There is a size increase of 19 ± 2 nm monitored by multi angle dynamic light scattering attributed to the hard protein corona around nanoparticles. The angular dependency of the inverse hydrodynamic radii of un-functionalized PS is demonstrated.

**Table 3:** *Hard corona* hydrodynamic radii of polystyrene nanoparticles incubated within human serum and centrifuged was measured by multi angle dynamic light scattering.

|                     | Hydrodynamic radius (NP with <i>hard corona</i> )<br>$R_h$ (H <sub>2</sub> O) |
|---------------------|-------------------------------------------------------------------------------|
| PS                  | 92 ± 9.2 nm                                                                   |
| PS- COOH            | 80 ± 8.0 nm                                                                   |
| PS- NH <sub>2</sub> | 88 ± 8.8 nm                                                                   |

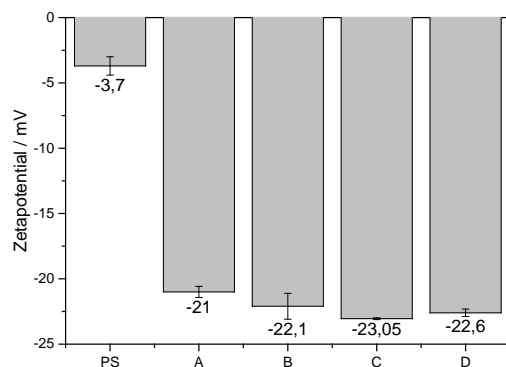

**Figure 9:** Zeta-potential after incubation, centrifugation and washing of un-functionalized PS nanoparticles incubated with human serum. Due to protein adsorption the zeta-potential is strongly decreased.

## Quantification of adsorbed proteins and remaining content of proteins in the supernatant

**Table 4:** Amount of adsorbed protein in  $\mu\text{g}$  per  $0.05 \text{ m}^2$  NP determined after each purification step (A = First centrifugation, B = 1. Wash, C = 2. Wash, D = Third wash)

| Preparation PS | Amount of adsorbed protein per $0.05 \text{ m}^2$ NP |
|----------------|------------------------------------------------------|
| A              | $781.9 \pm 38.6 \mu\text{g}$                         |
| B              | $87.22 \pm 2.42 \mu\text{g}$                         |
| C              | $50.51 \pm 2.28 \mu\text{g}$                         |
| D              | $49.18 \pm 3.00 \mu\text{g}$                         |

| Preparation PS- COOH | Amount of adsorbed protein per $0.05 \text{ m}^2$ NP |
|----------------------|------------------------------------------------------|
| A                    | $1208.22 \pm 101.38 \mu\text{g}$                     |
| D                    | $137.35 \pm 1.38 \mu\text{g}$                        |

| Preparation PS- $\text{NH}_2$ | Amount of adsorbed protein per $0.05 \text{ m}^2$ NP |
|-------------------------------|------------------------------------------------------|
| A                             | $1055.97 \pm 18.78 \mu\text{g}$                      |
| D                             | $66.70 \pm 4.93 \mu\text{g}$                         |

**Table 5:** Protein concentration in the remaining supernatant after centrifugation and washing. After the third wash the protein concentration is below the detectable range of the Pierce assay.

| Supernatant | Concentration (mg/mL) |
|-------------|-----------------------|
|-------------|-----------------------|



|          |                                 |
|----------|---------------------------------|
| <b>A</b> | $47.97 \pm 1.71 \text{ mg/mL}$  |
| <b>B</b> | $1.43 \pm 0.03 \text{ mg/mL}$   |
| <b>C</b> | $0.07 \pm 0.02 \text{ mg/mL}$   |
| <b>D</b> | * (below $0.05 \text{ mg/mL}$ ) |

**Table 6:** Amount of recovered nanoparticle after the first centrifugation and last washing steps for all nanoparticles measured via fluorescence intensity of nanoparticles at the initial concentration.

| Preparation | PS                | PS- COOH          | PS- NH2           |
|-------------|-------------------|-------------------|-------------------|
| <b>A</b>    | $71.7 \pm 4.8 \%$ | $83.6 \pm 3.2 \%$ | $86.8 \pm 5.9 \%$ |
| <b>D</b>    | $68.3 \pm 3.4 \%$ | $72.7 \pm 3.4 \%$ | $66.8 \pm 1.2 \%$ |

## Classification of corona proteins

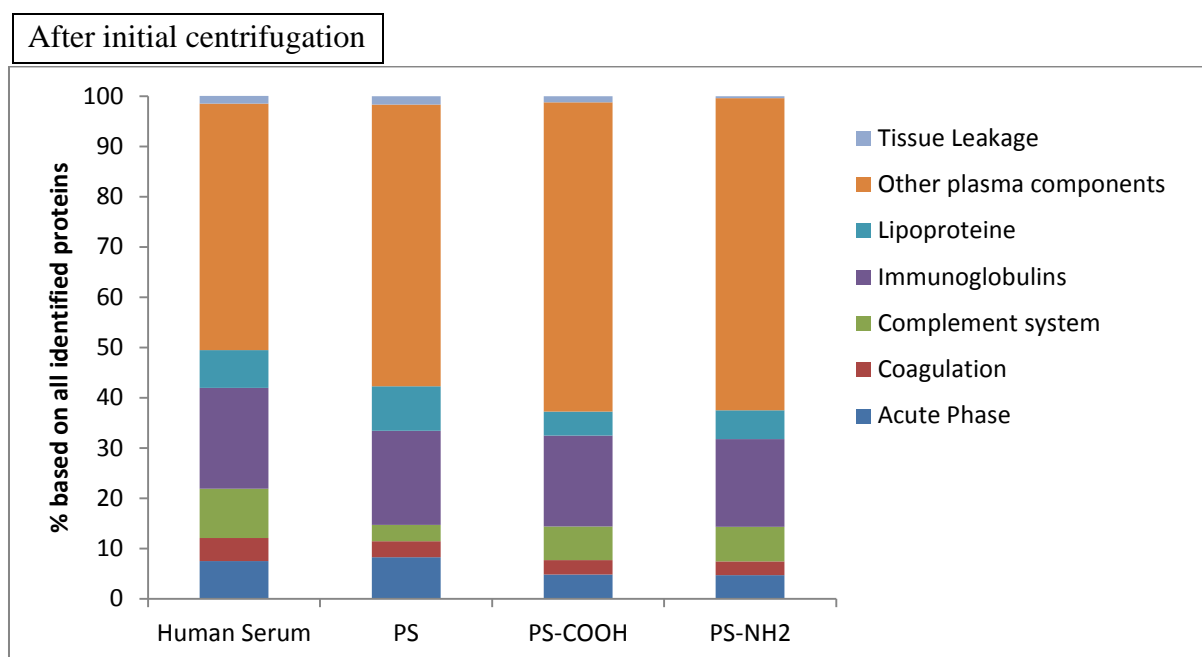

**Figure 10:** LC-MS Protein classification of proteins associated with nanoparticles after the first centrifugation (A). There is no significant difference in the protein pattern for all nanoparticles.

After 3. wash

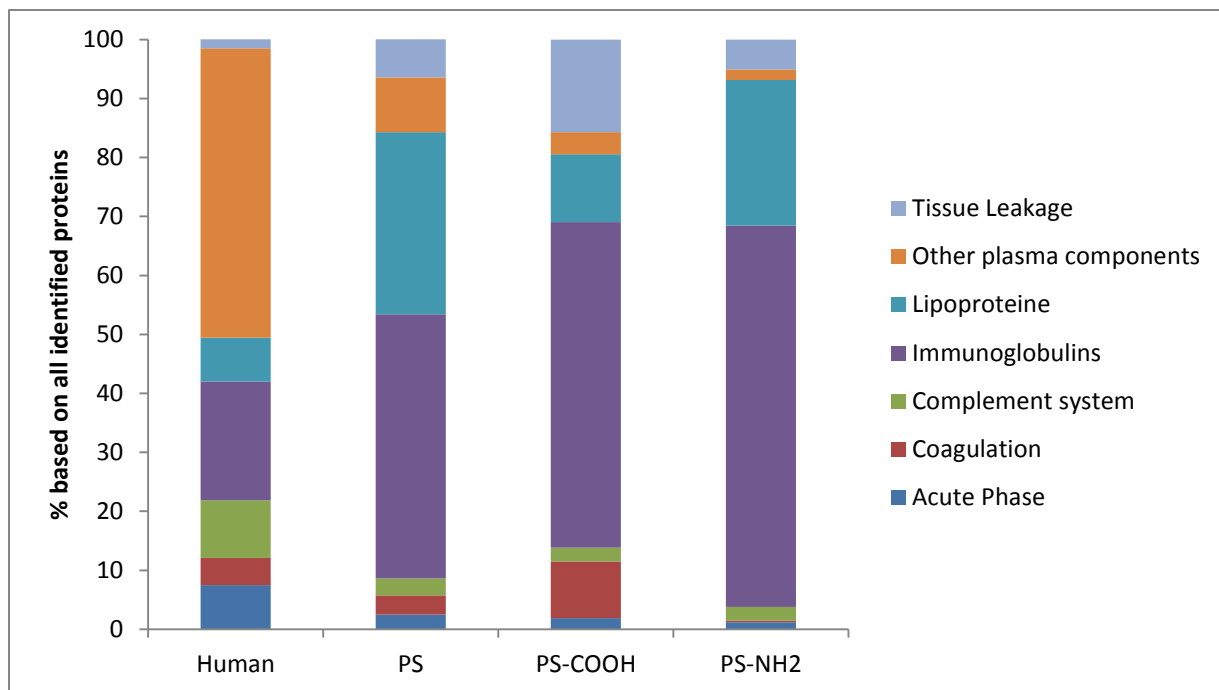

**Figure 11:** LC-MS Protein classification of proteins associated with nanoparticles after the third wash (D). The distinct hard protein corona profile depends on surface functionalization of nanoparticles and highly differs from the protein composition in human serum.

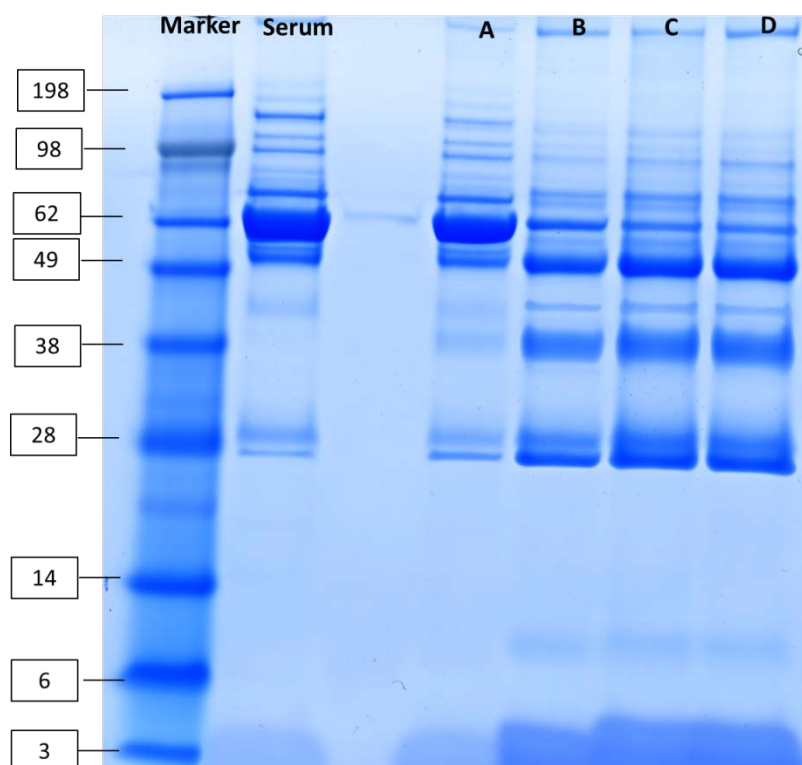

**Figure 12:** Evolution of the hard corona profile after each purification step for un-functionalized PS nanoparticles visualized by SDS-PAGE. (A = First centrifugation, B = 1. Wash, C = 2. Wash, D = Third wash)

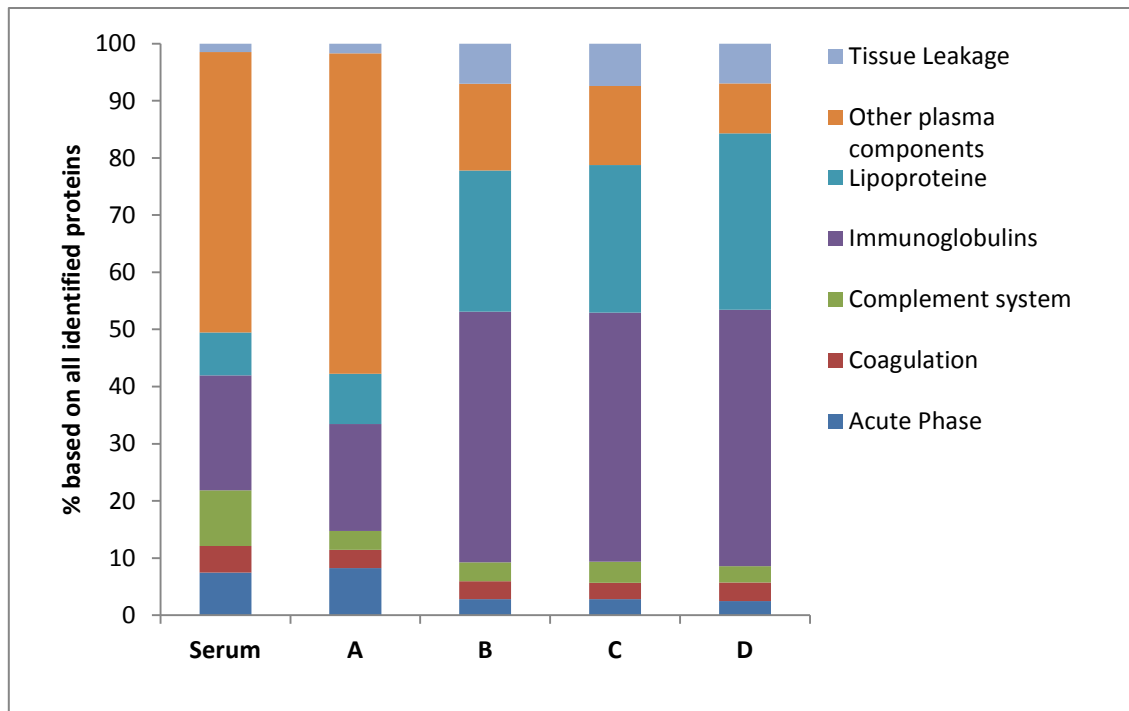

**Figure 13:** LC-MS Protein classification of proteins associated with un-functionalized PS nanoparticles after each purification step. (A = First centrifugation, B = 1. Wash, C = 2. Wash, D = Third wash)

Cellular interactions of protein corona coated nanoparticles

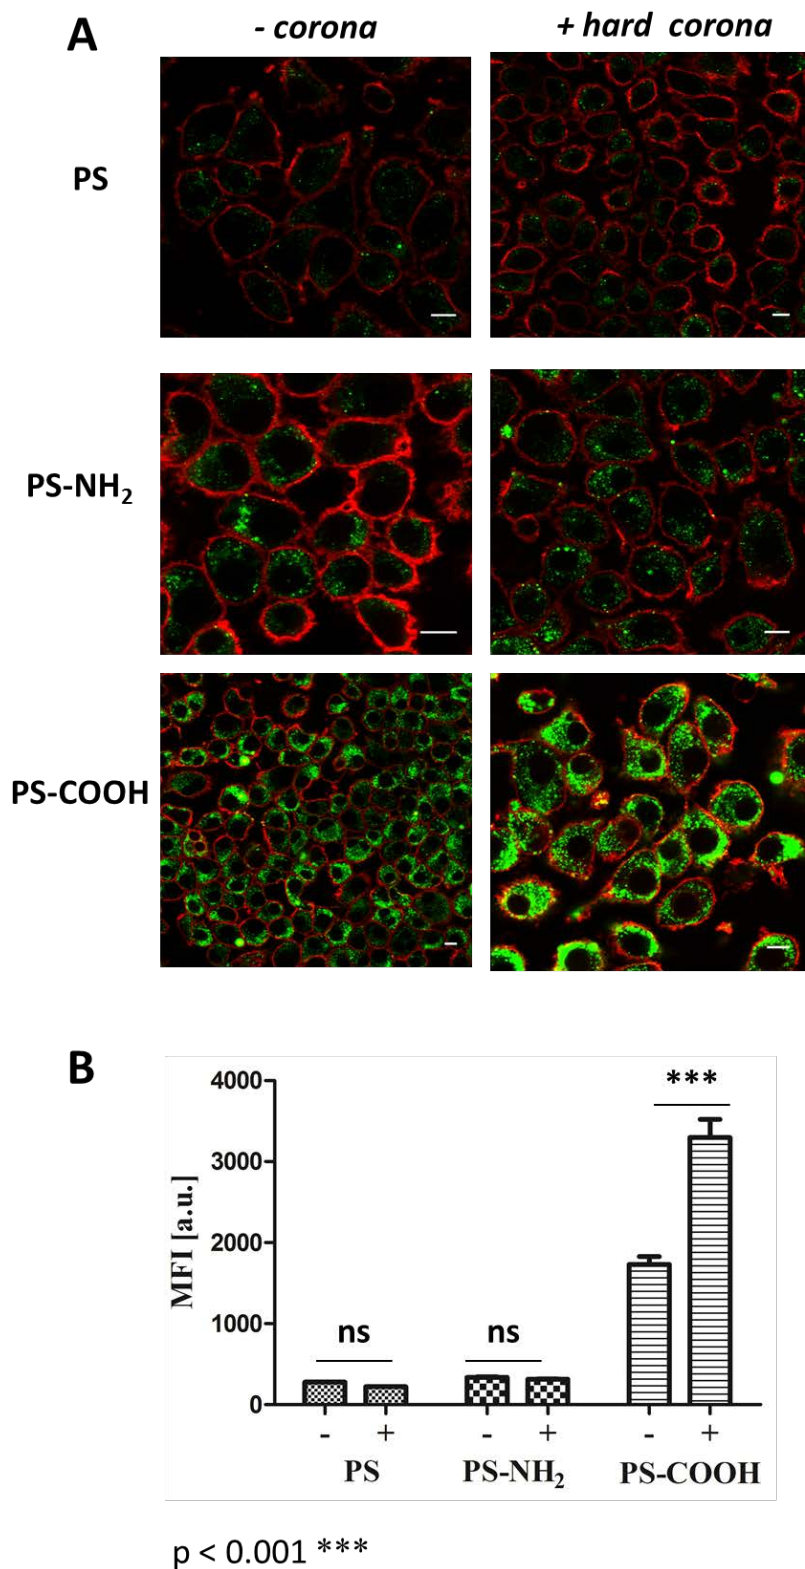

**Figure 14: A.** Confocal laser scanning microscopy images: RAW264.7 cells were incubated with un-functionalized or functionalized polystyrene nanoparticles (300µg/mL) for 1h. Prior to cellular uptake studies, nanoparticles were incubated with human serum for 1h at 37°C, centrifuged and washed to remove unbound proteins. Isolated hard corona coated nanoparticles (+) or uncoated nanoparticles (-) were added to serum free cell culture medium. Scale

bar: 10 $\mu$ m **B.** Flow cytometry experiments: RAW264.7 cells were incubated with un-functionalized or functionalized polystyrene nanoparticles coated with (+/-) or without hard protein corona (300 $\mu$ g/mL) for 1h. The average of the median fluorescence intensity of three independent experiments is shown (n=3). GraphPad Prism 5 Software was used for statistical analysis using a one-way ANOVA followed by Tukey's post-hoc multiple comparisons test. A *p*-value of < 0.001 was considered as highly significant\*\*\*.

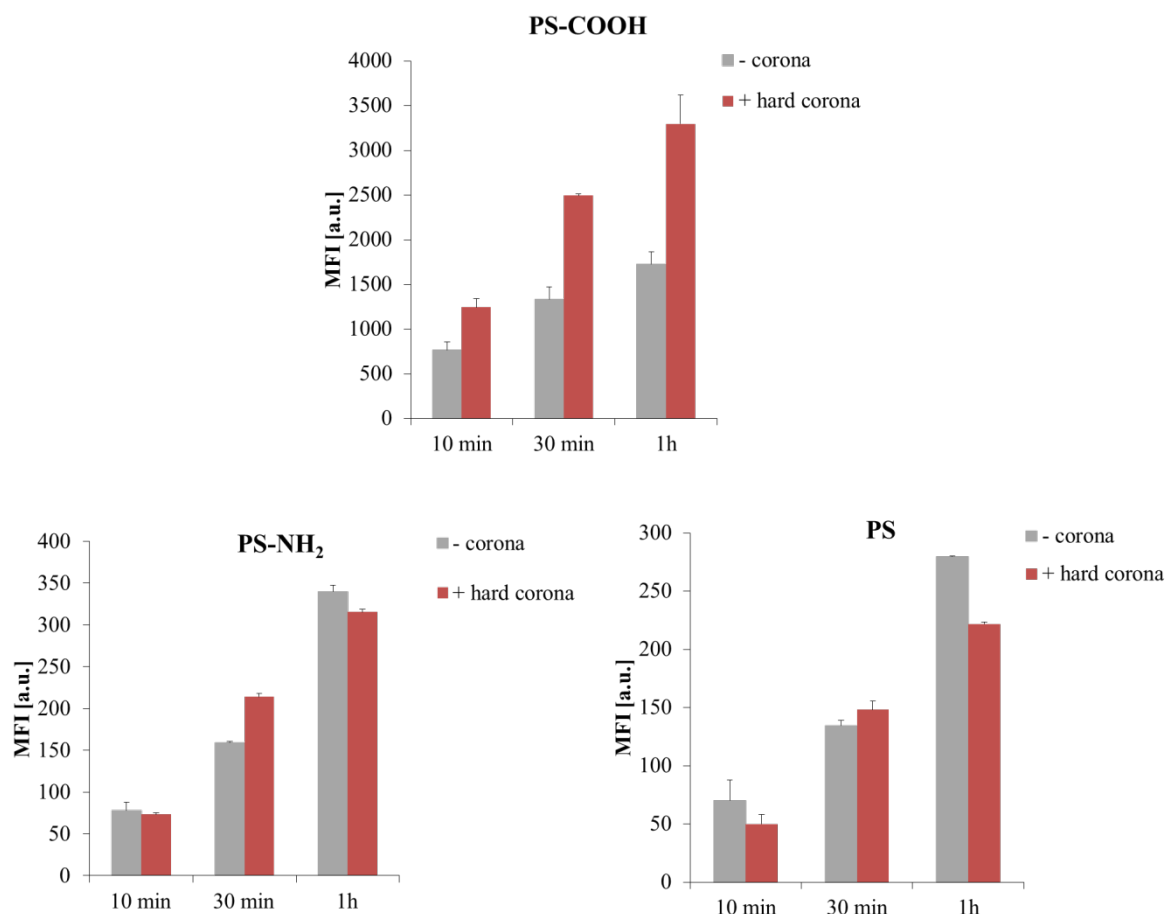

**Figure 15:** Flow cytometry analysis: RAW264.7 cells were incubated with un-functionalized or functionalized polystyrene nanoparticles (300 $\mu$ g/mL) for 10 min, 30 mins or 1h. Prior to cellular uptake studies, nanoparticles were incubated with human serum for 1h at 37°C, centrifuged and washed to remove unbound proteins. Isolated hard corona coated nanoparticles (+) or uncoated nanoparticles (-) were added to serum free cell culture medium. The average of the median fluorescence intensity (MFI) of three independent experiments is shown (n=3).



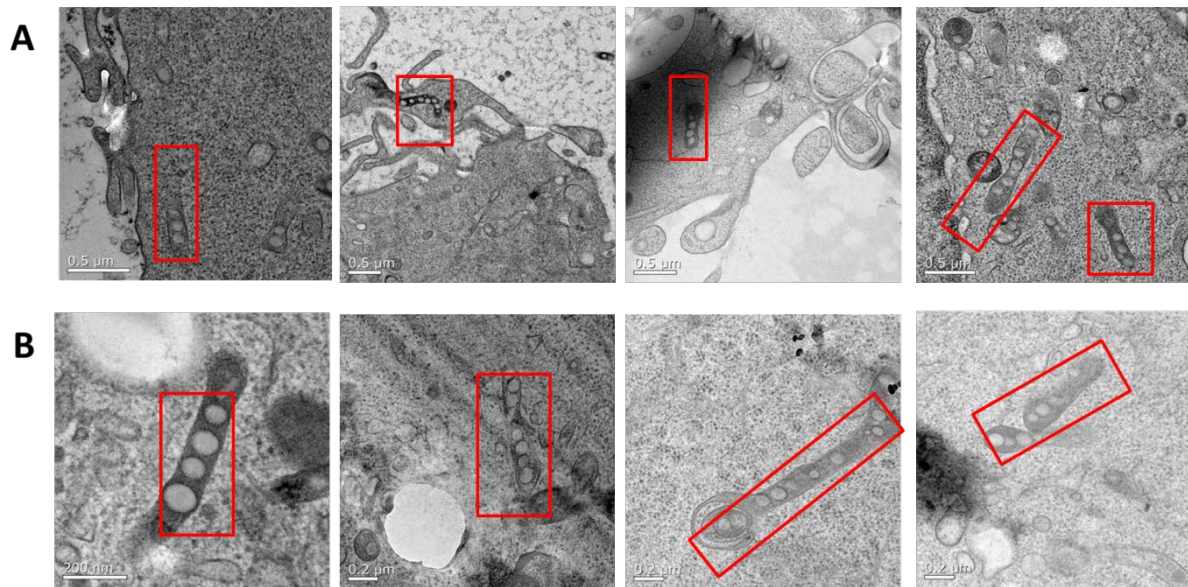

**Figure 16:** TEM micrographs of high-pressure frozen macrophages treated with 300 µg/mL of un-functionalized nanoparticles **without** (-) hard protein corona for 1h. Scale bar: **A** = 0.5µm; **B** = 200nm. Numerous un-functionalized polystyrene nanoparticles were packed in long membrane structures (CLIC/GEEC endocytosis pathway).

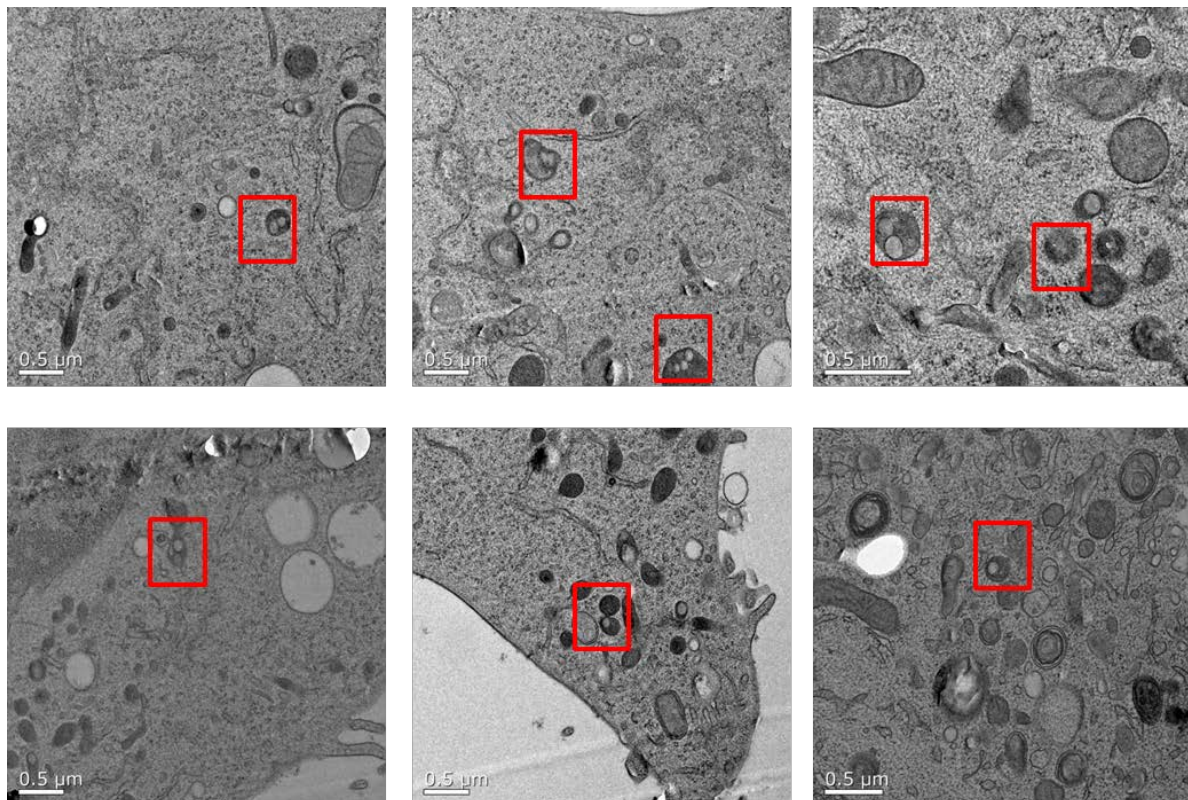

**Figure 17:** TEM micrographs of high-pressure frozen macrophages treated with 300 µg/mL of un-functionalized nanoparticles **with** (+) hard protein corona for 1h. (+). Scale bar: 0.5µm Hard corona coated un-functionalized PS-NPs were packed in small vesicles (either individually or in a group of 2-3).

## LC MS Analysis

**Table 7:** LC MS Analysis: All identified corona proteins associated with unfunctionalized nanoparticles (PS) after each purification step in comparison to human serum. Values are presented in % based on all identified proteins (in fmol).

| Annotation        | Description                           | Human Serum | PS       |          |          |          |
|-------------------|---------------------------------------|-------------|----------|----------|----------|----------|
|                   |                                       |             | 1st Cent | 1st Wash | 2nd Wash | 3rd Wash |
| Acute Phase       | Alpha-1-acid glycoprotein 1           | 0.61        | 0.54     | 0.07     | 0.04     | 0.04     |
| Acute Phase       | Alpha-1-acid glycoprotein 2           | 0.23        | 0.25     | 0.08     | 0.05     | 0.04     |
| Acute Phase       | Alpha-1-antichymotrypsin              | 0.33        | 2.71     | 0.00     | 0.00     | 0.00     |
| Acute Phase       | Alpha-2-macroglobulin                 | 0.87        | 0.58     | 0.78     | 0.91     | 0.58     |
| Acute Phase       | Ceruloplasmin                         | 0.32        | 0.64     | 0.05     | 0.03     | 0.02     |
| Acute Phase       | Fibronectin                           | 0.05        | 0.00     | 0.00     | 0.00     | 0.00     |
| Acute Phase       | Haptoglobin                           | 2.03        | 0.85     | 0.58     | 0.53     | 0.60     |
| Acute Phase       | Haptoglobin-related protein           | 0.18        | 0.32     | 0.06     | 0.06     | 0.04     |
| Acute Phase       | Lipopolysaccharide-binding protein    | 0.00        | 0.00     | 0.00     | 0.00     | 0.00     |
| Acute Phase       | Platelet basic protein                | 0.00        | 0.00     | 0.00     | 0.00     | 0.00     |
| Acute Phase       | Serum amyloid A-1 protein             | 0.00        | 0.00     | 0.03     | 0.04     | 0.04     |
| Acute Phase       | Serum amyloid P-component             | 0.00        | 0.67     | 0.63     | 0.44     | 0.46     |
| Coagulation       | Alpha-2-antiplasmin                   | 0.00        | 0.00     | 0.00     | 0.00     | 0.00     |
| Coagulation       | Antithrombin-III                      | 0.10        | 1.17     | 2.47     | 2.61     | 3.02     |
| Coagulation       | Carboxypeptidase B2                   | 0.00        | 0.00     | 0.08     | 0.09     | 0.08     |
| Coagulation       | Coagulation factor V                  | 0.00        | 0.00     | 0.04     | 0.04     | 0.04     |
| Coagulation       | Coagulation factor XI                 | 0.00        | 0.00     | 0.00     | 0.00     | 0.00     |
| Coagulation       | Fibrinogen alpha chain                | 0.00        | 0.00     | 0.00     | 0.00     | 0.00     |
| Coagulation       | Heparin cofactor 2                    | 0.00        | 0.00     | 0.00     | 0.00     | 0.00     |
| Coagulation       | Histidine-rich glycoprotein           | 0.08        | 0.04     | 0.00     | 0.00     | 0.00     |
| Coagulation       | Integrin alpha-IIb                    | 0.00        | 0.00     | 0.00     | 0.00     | 0.00     |
| Coagulation       | Integrin beta-3                       | 0.00        | 0.00     | 0.00     | 0.00     | 0.00     |
| Coagulation       | Plasma serine protease inhibitor      | 0.00        | 0.00     | 0.00     | 0.00     | 0.00     |
| Coagulation       | Plasminogen                           | 0.44        | 0.46     | 0.00     | 0.00     | 0.00     |
| Coagulation       | Platelet factor 4                     | 0.00        | 0.00     | 0.00     | 0.00     | 0.00     |
| Coagulation       | Prothrombin                           | 0.13        | 1.42     | 0.58     | 0.59     | 0.62     |
| Complement system | C4b-binding protein alpha chain       | 0.13        | 0.08     | 0.00     | 0.00     | 0.00     |
| Complement system | Calmodulin-like protein 5             | 0.00        | 0.00     | 0.00     | 0.00     | 0.00     |
| Complement system | Complement C1q subcomponent subunit B | 0.00        | 0.00     | 0.76     | 0.94     | 0.50     |
| Complement system | Complement C1q subcomponent subunit C | 0.05        | 0.09     | 0.23     | 0.22     | 0.16     |
| Complement system | Complement C1r subcomponent           | 0.00        | 0.00     | 0.08     | 0.07     | 0.06     |
| Complement system | Complement C1s subcomponent           | 0.00        | 0.00     | 0.29     | 0.35     | 0.20     |

|                   |                                         |      |      |       |       |       |
|-------------------|-----------------------------------------|------|------|-------|-------|-------|
| system            |                                         |      |      |       |       |       |
| Complement system | Complement C3                           | 1.31 | 1.03 | 0.25  | 0.22  | 0.14  |
| Complement system | Complement C4-A                         | 0.00 | 0.00 | 0.00  | 0.00  | 0.00  |
| Complement system | Complement C4-A                         | 0.19 | 1.51 | 0.00  | 0.00  | 0.00  |
| Complement system | Complement C4-B                         | 0.00 | 0.00 | 0.00  | 0.00  | 0.00  |
| Complement system | Complement C4-B                         | 0.00 | 0.00 | 0.60  | 0.59  | 0.42  |
| Complement system | Complement C5                           | 0.00 | 0.00 | 0.00  | 0.00  | 0.00  |
| Complement system | Complement component C6                 | 0.00 | 0.00 | 0.00  | 0.00  | 0.00  |
| Complement system | Complement component C7                 | 0.00 | 0.00 | 0.00  | 0.00  | 0.00  |
| Complement system | Complement component C8                 | 0.00 | 0.00 | 0.00  | 0.00  | 0.00  |
| Complement system | Complement component C8 alpha chain     | 0.00 | 0.00 | 0.00  | 0.00  | 0.00  |
| Complement system | Complement component C8 gamma chain     | 0.00 | 0.00 | 0.02  | 0.02  | 0.02  |
| Complement system | Complement component C9                 | 0.00 | 0.00 | 0.57  | 0.65  | 0.71  |
| Complement system | Complement factor B                     | 0.15 | 0.04 | 0.00  | 0.00  | 0.00  |
| Complement system | Complement factor H                     | 0.12 | 0.20 | 0.15  | 0.18  | 0.17  |
| Complement system | Complement factor H-related protein 1   | 0.00 | 0.00 | 0.00  | 0.00  | 0.00  |
| Complement system | Complement factor H-related protein 5   | 0.00 | 0.00 | 0.00  | 0.00  | 0.00  |
| Complement system | Ig lambda chain V-I                     | 0.00 | 0.00 | 0.00  | 0.00  | 0.00  |
| Complement system | Mannan-binding lectin serine protease 1 | 0.00 | 0.00 | 0.00  | 0.00  | 0.00  |
| Complement system | Plasma protease C1 inhibitor            | 0.18 | 0.18 | 0.25  | 0.22  | 0.20  |
| Complement system | Properdin                               | 0.00 | 0.00 | 0.06  | 0.06  | 0.06  |
| Immunoglobulins   | Ig alpha-1 chain C                      | 1.46 | 0.65 | 0.23  | 0.20  | 0.11  |
| Immunoglobulins   | Ig alpha-2 chain C                      | 0.10 | 0.00 | 0.00  | 0.00  | 0.00  |
| Immunoglobulins   | Ig delta chain C                        | 0.00 | 0.00 | 0.00  | 0.00  | 0.00  |
| Immunoglobulins   | Ig gamma-1 chain C                      | 7.87 | 4.98 | 20.41 | 20.29 | 20.70 |
| Immunoglobulins   | Ig gamma-2 chain C                      | 2.58 | 0.73 | 0.61  | 0.63  | 0.80  |
| Immunoglobulins   | Ig gamma-3 chain C                      | 0.70 | 0.34 | 1.48  | 1.43  | 1.57  |
| Immunoglobulins   | Ig gamma-4 chain C                      | 0.06 | 0.58 | 0.83  | 0.91  | 0.97  |
| Immunoglobulins   | Ig gamma-4 chain C                      | 0.00 | 0.00 | 0.19  | 0.21  | 0.18  |
| Immunoglobulins   | Ig heavy chain V-I                      | 0.00 | 0.00 | 0.00  | 0.00  | 0.00  |
| Immunoglobulins   | Ig heavy chain V-I                      | 0.00 | 0.00 | 0.21  | 0.24  | 0.21  |
| Immunoglobulins   | Ig heavy chain V-I                      | 0.00 | 0.00 | 0.04  | 0.05  | 0.04  |
| Immunoglobulins   | Ig heavy chain V-II                     | 0.00 | 0.12 | 0.27  | 0.25  | 0.20  |
| Immunoglobulins   | Ig heavy chain V-II                     | 0.00 | 0.00 | 0.00  | 0.00  | 0.00  |
| Immunoglobulins   | Ig heavy chain V-II                     | 0.00 | 0.00 | 0.00  | 0.00  | 0.00  |
| Immunoglobulins   | Ig heavy chain V-II                     | 0.00 | 0.00 | 0.00  | 0.00  | 0.00  |



|                 |                                          |      |      |       |       |       |
|-----------------|------------------------------------------|------|------|-------|-------|-------|
| Immunoglobulins | Ig heavy chain V-II                      | 0.00 | 0.00 | 0.00  | 0.00  | 0.00  |
| Immunoglobulins | Ig heavy chain V-III                     | 0.30 | 0.30 | 1.80  | 1.93  | 1.70  |
| Immunoglobulins | Ig kappa chain C                         | 9.85 | 6.38 | 19.49 | 20.11 | 19.86 |
| Immunoglobulins | Ig kappa chain V-II                      | 0.00 | 0.00 | 0.13  | 0.13  | 0.13  |
| Immunoglobulins | Ig kappa chain V-II                      | 0.00 | 0.00 | 0.00  | 0.00  | 0.00  |
| Immunoglobulins | Ig kappa chain V-II                      | 0.00 | 0.17 | 0.00  | 0.00  | 0.00  |
| Immunoglobulins | Ig kappa chain V-II                      | 0.00 | 0.00 | 0.00  | 0.00  | 0.00  |
| Immunoglobulins | Ig kappa chain V-II                      | 0.00 | 0.00 | 0.00  | 0.00  | 0.00  |
| Immunoglobulins | Ig kappa chain V-II                      | 0.00 | 0.00 | 0.24  | 0.24  | 0.24  |
| Immunoglobulins | Ig kappa chain V-III 1                   | 0.69 | 0.13 | 0.88  | 0.93  | 0.83  |
| Immunoglobulins | Ig kappa chain V-IV                      | 0.00 | 0.00 | 0.00  | 0.00  | 0.00  |
| Immunoglobulins | Ig kappa chain V-IV                      | 0.18 | 0.00 | 0.00  | 0.00  | 0.00  |
| Immunoglobulins | Ig kappa chain V-IV                      | 0.00 | 0.00 | 0.00  | 0.00  | 0.00  |
| Immunoglobulins | Ig kappa chain V-IV                      | 0.00 | 0.00 | 0.50  | 0.44  | 0.28  |
| Immunoglobulins | Ig kappa chain V-IV                      | 0.00 | 0.00 | 0.13  | 0.12  | 0.14  |
| Immunoglobulins | Ig kappa chain V-IV                      | 0.00 | 0.09 | 0.00  | 0.00  | 0.00  |
| Immunoglobulins | Ig lambda chain V-I                      | 0.00 | 0.00 | 0.00  | 0.00  | 0.00  |
| Immunoglobulins | Ig lambda chain V-I                      | 0.00 | 0.00 | 0.00  | 0.00  | 0.00  |
| Immunoglobulins | Ig lambda chain V-II                     | 0.00 | 0.00 | 0.00  | 0.00  | 0.00  |
| Immunoglobulins | Ig lambda chain V-III                    | 0.11 | 0.00 | 0.00  | 0.00  | 0.00  |
| Immunoglobulins | Ig lambda chain V-III                    | 0.14 | 0.00 | 0.11  | 0.11  | 0.10  |
| Immunoglobulins | Ig lambda-2 chain C                      | 1.72 | 0.00 | 0.00  | 0.00  | 0.00  |
| Immunoglobulins | Ig lambda-3 chain C                      | 0.00 | 0.00 | 0.00  | 0.00  | 0.00  |
| Immunoglobulins | Ig lambda-7 chain C                      | 0.00 | 0.00 | 0.67  | 0.61  | 0.73  |
| Immunoglobulins | Ig mu chain C                            | 0.00 | 0.00 | 1.90  | 0.92  | 0.79  |
| Immunoglobulins | Ig mu chain C region                     | 0.87 | 1.03 | 0.00  | 0.00  | 0.00  |
| Immunoglobulins | Ig mu heavy chain disease protein        | 0.00 | 0.00 | 0.06  | 0.03  | 0.03  |
| Immunoglobulins | Immunoglobulin J                         | 0.00 | 0.00 | 0.00  | 0.00  | 0.00  |
| Immunoglobulins | Immunoglobulin J                         | 0.00 | 0.00 | 0.00  | 0.00  | 0.00  |
| Immunoglobulins | Immunoglobulin lambda-like polypeptide 5 | 0.88 | 1.43 | 2.34  | 2.57  | 2.30  |
| Immunoglobulins | Plasma kallikrein                        | 0.00 | 0.00 | 0.00  | 0.00  | 0.00  |
| Lipoproteins    | Apolipoprotein A-I                       | 1.88 | 1.75 | 8.65  | 10.29 | 12.90 |
| Lipoproteins    | Apolipoprotein A-II                      | 0.00 | 0.08 | 0.13  | 0.13  | 0.15  |
| Lipoproteins    | Apolipoprotein A-IV                      | 0.09 | 1.33 | 0.78  | 0.89  | 0.84  |
| Lipoproteins    | Apolipoprotein A-V                       | 0.00 | 0.00 | 0.00  | 0.00  | 0.00  |
| Lipoproteins    | Apolipoprotein B-100                     | 0.20 | 2.03 | 1.03  | 1.01  | 1.23  |
| Lipoproteins    | Apolipoprotein C-II                      | 0.00 | 0.00 | 0.07  | 0.07  | 0.08  |
| Lipoproteins    | Apolipoprotein C-III                     | 0.00 | 0.00 | 1.37  | 1.77  | 1.94  |
| Lipoproteins    | Apolipoprotein C-IV                      | 0.00 | 0.00 | 0.00  | 0.00  | 0.00  |
| Lipoproteins    | Apolipoprotein D                         | 0.00 | 0.00 | 0.11  | 0.14  | 0.10  |
| Lipoproteins    | Apolipoprotein E                         | 0.00 | 0.32 | 0.52  | 0.56  | 0.65  |
| Lipoproteins    | Apolipoprotein L1                        | 0.00 | 0.00 | 0.00  | 0.00  | 0.00  |
| Lipoproteins    | Apolipoprotein M                         | 0.00 | 0.00 | 0.05  | 0.03  | 0.04  |
| Lipoproteins    | Beta-2-glycoprotein 1                    | 0.23 | 0.89 | 0.09  | 0.07  | 0.06  |
| Lipoproteins    | Clusterin                                | 0.23 | 2.11 | 14.89 | 14.99 | 16.77 |
| Lipoproteins    | Phospholipid transfer protein            | 0.00 | 0.00 | 0.63  | 0.57  | 0.49  |
| Lipoproteins    | Serum paraoxonase/arylesterase 1         | 0.10 | 0.04 | 0.00  | 0.00  | 0.00  |

|                         |                                                                 |      |      |      |      |      |
|-------------------------|-----------------------------------------------------------------|------|------|------|------|------|
| Other Plasma components | Actin, cytoplasmic 1                                            | 0.00 | 0.00 | 0.00 | 0.00 | 0.00 |
| Other Plasma components | Actin, gamma-enteric smooth muscle                              | 0.00 | 0.00 | 0.00 | 0.00 | 0.00 |
| Other Plasma components | Alpha-1-antitrypsin                                             | 1.74 | 1.24 | 0.28 | 0.25 | 0.18 |
| Other Plasma components | Alpha-1B-glycoprotein                                           | 0.21 | 0.16 | 0.00 | 0.00 | 0.00 |
| Other Plasma components | Alpha-2-HS-glycoprotein                                         | 0.61 | 0.27 | 0.00 | 0.00 | 0.00 |
| Other Plasma components | Angiotensinogen                                                 | 0.12 | 0.57 | 0.00 | 0.00 | 0.00 |
| Other Plasma components | Annexin A2                                                      | 0.00 | 0.00 | 0.00 | 0.00 | 0.00 |
| Other Plasma components | AP-1 complex subunit sigma-2                                    | 0.00 | 0.00 | 0.00 | 0.00 | 0.00 |
| Other Plasma components | Bone morphogenetic protein 8B                                   | 0.00 | 0.00 | 0.00 | 0.00 | 0.00 |
| Other Plasma components | BPI fold-containing family A member 1                           | 0.00 | 0.00 | 0.08 | 1.06 | 0.06 |
| Other Plasma components | Brain and acute leukemia cytoplasmic protein                    | 0.00 | 0.00 | 0.00 | 0.00 | 0.00 |
| Other Plasma components | BTB/POZ domain-containing protein                               | 0.00 | 1.33 | 0.00 | 0.00 | 0.00 |
| Other Plasma components | Calcium-transporting ATPase type 2C member 2                    | 0.00 | 0.00 | 0.00 | 0.00 | 0.00 |
| Other Plasma components | Carbonyl reductase [NADPH] 1                                    | 0.00 | 0.00 | 0.00 | 0.00 | 0.00 |
| Other Plasma components | Caspase-14                                                      | 0.00 | 0.00 | 0.00 | 0.00 | 0.00 |
| Other Plasma components | Cofilin-2                                                       | 0.00 | 0.00 | 0.00 | 0.00 | 0.00 |
| Other Plasma components | Cytohesin-1                                                     | 0.00 | 0.00 | 0.00 | 0.00 | 0.00 |
| Other Plasma components | DnaJ homolog subfamily B member 4                               | 0.00 | 0.00 | 0.00 | 0.00 | 0.00 |
| Other Plasma components | E3 SUMO-protein ligase PIAS3                                    | 0.00 | 0.00 | 0.00 | 0.00 | 0.00 |
| Other Plasma components | Eukaryotic translation initiation factor 1b                     | 0.00 | 0.00 | 0.00 | 0.00 | 0.00 |
| Other Plasma components | F-actin-capping protein subunit alpha-2                         | 0.00 | 0.18 | 0.00 | 0.00 | 0.00 |
| Other Plasma components | Frataxin, mitochondrial                                         | 0.00 | 0.13 | 0.00 | 0.00 | 0.00 |
| Other Plasma components | Ganglioside-induced differentiation-associated protein 1-like 1 | 0.00 | 0.00 | 0.00 | 0.00 | 0.00 |
| Other Plasma components | Glutathione peroxidase 3                                        | 0.00 | 0.00 | 0.00 | 0.00 | 0.00 |
| Other Plasma components | Hemoglobin subunit beta                                         | 0.00 | 0.00 | 0.00 | 0.00 | 0.00 |
| Other Plasma components | Hemoglobin subunit beta                                         | 0.00 | 0.00 | 0.00 | 0.00 | 0.00 |
| Other Plasma components | Hemoglobin subunit delta                                        | 0.00 | 0.00 | 0.00 | 0.00 | 0.00 |
| Other Plasma components | Hemoglobin subunit gamma-2                                      | 0.00 | 0.00 | 0.00 | 0.00 | 0.00 |
| Other Plasma components | Hemopexin                                                       | 0.00 | 0.00 | 0.00 | 0.00 | 0.00 |
| Other Plasma components | Hemopexin                                                       | 1.43 | 0.91 | 0.18 | 0.15 | 0.09 |
| Other Plasma components | Homeobox protein Meis1                                          | 0.00 | 0.00 | 0.00 | 0.00 | 0.00 |

|                         |                                                                        |      |      |      |      |      |
|-------------------------|------------------------------------------------------------------------|------|------|------|------|------|
| components              |                                                                        |      |      |      |      |      |
| Other Plasma components | Inactive ubiquitin carboxyl-terminal hydrolase 17-like protein 7       | 0.00 | 0.00 | 0.00 | 0.00 | 0.00 |
| Other Plasma components | Insulin-like growth factor-binding protein complex acid labile subunit | 0.02 | 0.01 | 0.02 | 0.02 | 0.02 |
| Other Plasma components | Inter-alpha-trypsin inhibitor heavy chain H1                           | 0.20 | 0.33 | 0.00 | 0.00 | 0.00 |
| Other Plasma components | Inter-alpha-trypsin inhibitor heavy chain H2                           | 0.18 | 0.21 | 0.00 | 0.00 | 0.00 |
| Other Plasma components | Inter-alpha-trypsin inhibitor heavy chain H4                           | 0.13 | 0.17 | 0.00 | 0.00 | 0.00 |
| Other Plasma components | Keratin                                                                | 0.37 | 0.54 | 0.62 | 0.83 | 0.65 |
| Other Plasma components | LIM domain only protein 3                                              | 0.00 | 0.00 | 0.00 | 0.00 | 0.00 |
| Other Plasma components | L-lactate dehydrogenase C                                              | 0.00 | 0.00 | 0.00 | 0.00 | 0.00 |
| Other Plasma components | Lysozyme C                                                             | 0.00 | 0.00 | 0.00 | 0.04 | 0.00 |
| Other Plasma components | Microtubule-associated protein RP/EB family member 3                   | 0.00 | 0.00 | 0.00 | 0.00 | 0.00 |
| Other Plasma components | Multimerin-1                                                           | 0.00 | 0.00 | 0.00 | 0.00 | 0.00 |
| Other Plasma components | Myb/SANT-like DNA-binding domain-containing protein 4                  | 0.00 | 0.00 | 0.00 | 0.00 | 0.00 |
| Other Plasma components | Neuroblastoma breakpoint family member 4                               | 0.00 | 0.11 | 0.00 | 0.00 | 0.00 |
| Other Plasma components | Neutrophil gelatinase-associated lipocalin                             | 0.00 | 0.00 | 0.00 | 0.00 | 0.00 |
| Other Plasma components | Oxidoreductase NAD-binding domain-containing protein 1                 | 0.00 | 0.00 | 0.00 | 0.00 | 0.00 |
| Other Plasma components | Paired mesoderm homeobox protein 1                                     | 0.00 | 0.07 | 0.00 | 0.00 | 0.00 |
| Other Plasma components | Pancreatic secretory trypsin inhibitor                                 | 0.00 | 0.00 | 0.00 | 0.00 | 0.00 |
| Other Plasma components | Platelet factor 4 variant                                              | 0.00 | 0.00 | 0.00 | 0.00 | 0.00 |
| Other Plasma components | Platelet glycoprotein 4                                                | 0.00 | 0.00 | 0.00 | 0.00 | 0.00 |
| Other Plasma components | Pleckstrin                                                             | 0.00 | 0.00 | 0.00 | 0.00 | 0.00 |
| Other Plasma components | Polymeric immunoglobulin receptor                                      | 0.00 | 0.00 | 0.02 | 0.11 | 0.01 |
| Other Plasma components | POTE ankyrin domain family member E                                    | 0.00 | 0.00 | 0.00 | 0.00 | 0.00 |
| Other Plasma components | Pregnancy zone protein                                                 | 0.00 | 0.34 | 0.00 | 0.00 | 0.00 |
| Other Plasma components | Probable ribonuclease 11                                               | 0.00 | 0.02 | 0.00 | 0.00 | 0.00 |
| Other Plasma components | Procollagen C-endopeptidase enhancer 1                                 | 0.00 | 0.00 | 0.00 | 0.00 | 0.00 |
| Other Plasma components | Protein AMBP                                                           | 0.13 | 0.15 | 0.00 | 0.00 | 0.00 |
| Other Plasma components | Protein Njmu-R1                                                        | 0.00 | 2.36 | 0.00 | 0.00 | 0.00 |
| Other Plasma components | Protein slowmo homolog 1                                               | 0.00 | 0.00 | 0.00 | 0.00 | 0.00 |
| Other Plasma components | Protein SSX9                                                           | 0.00 | 0.03 | 0.00 | 0.00 | 0.00 |
| Other Plasma components | Putative annexin A2-like protein                                       | 0.00 | 0.00 | 0.00 | 0.00 | 0.00 |

|                         |                                                    |       |       |      |      |      |
|-------------------------|----------------------------------------------------|-------|-------|------|------|------|
| Other Plasma components | Putative Polycomb group protein ASXL1              | 0.00  | 0.00  | 0.00 | 0.00 | 0.00 |
| Other Plasma components | Ragulator complex protein                          | 0.00  | 1.02  | 0.00 | 0.00 | 0.00 |
| Other Plasma components | Reticulocalbin-3                                   | 0.00  | 0.00  | 0.00 | 0.00 | 0.00 |
| Other Plasma components | Retinol-binding protein 4                          | 0.00  | 0.00  | 0.00 | 0.00 | 0.00 |
| Other Plasma components | Ribonuclease 4                                     | 0.00  | 0.00  | 0.00 | 0.00 | 0.00 |
| Other Plasma components | RNA-binding protein Musashi homolog 1              | 0.00  | 0.00  | 0.00 | 0.00 | 0.00 |
| Other Plasma components | Selenoprotein P                                    | 0.00  | 0.00  | 0.00 | 0.00 | 0.00 |
| Other Plasma components | Serotransferrin                                    | 0.00  | 0.00  | 0.00 | 0.00 | 0.00 |
| Other Plasma components | Serum albumin                                      | 53.28 | 40.84 | 6.94 | 3.54 | 1.65 |
| Other Plasma components | Sideroflexin-5                                     | 0.00  | 0.00  | 0.00 | 0.00 | 0.00 |
| Other Plasma components | Synapsin-1                                         | 0.00  | 0.00  | 0.00 | 0.00 | 0.00 |
| Other Plasma components | TRAF family member-associated NF-kappa-B activator | 0.00  | 0.00  | 0.00 | 0.00 | 0.00 |
| Other Plasma components | Transgelin-2                                       | 0.00  | 0.00  | 0.00 | 0.00 | 0.00 |
| Other Plasma components | Transmembrane domain-containing protein            | 0.00  | 6.78  | 0.00 | 0.00 | 0.00 |
| Other Plasma components | Transmembrane protein 43                           | 0.00  | 0.00  | 0.00 | 0.00 | 0.00 |
| Other Plasma components | Transthyretin                                      | 0.40  | 0.37  | 0.13 | 0.12 | 0.09 |
| Other Plasma components | Ubiquitin-conjugating enzyme E2                    | 0.00  | 0.00  | 0.00 | 0.00 | 0.00 |
| Other Plasma components | Uncharacterized protein C10orf88                   | 0.00  | 0.00  | 0.00 | 0.00 | 0.00 |
| Other Plasma components | Uncharacterized protein C11orf70                   | 0.00  | 0.00  | 0.00 | 0.00 | 0.00 |
| Other Plasma components | Vitamin D-binding protein                          | 0.35  | 0.15  | 0.00 | 0.00 | 0.00 |
| Other Plasma components | Zinc-alpha-2-glycoprotein                          | 0.10  | 0.17  | 0.02 | 0.02 | 0.00 |
| Other Plasma components | Zymogen granule protein 16 homolog B               | 0.00  | 0.00  | 0.00 | 0.03 | 0.00 |
| Tissue Leakage          | 14-3-3 protein zeta/delta                          | 0.00  | 0.00  | 0.00 | 0.00 | 0.00 |
| Tissue Leakage          | ADP-ribosylation factor 1                          | 0.00  | 0.00  | 0.00 | 0.00 | 0.00 |
| Tissue Leakage          | ADP-ribosylation factor 3                          | 0.00  | 0.00  | 0.00 | 0.00 | 0.00 |
| Tissue Leakage          | ADP-ribosylation factor 5                          | 0.00  | 0.00  | 0.00 | 0.00 | 0.00 |
| Tissue Leakage          | Angiogenin                                         | 0.00  | 0.00  | 0.00 | 0.00 | 0.00 |
| Tissue Leakage          | Calcineurin subunit B type 1                       | 0.00  | 0.07  | 0.00 | 0.00 | 0.00 |
| Tissue Leakage          | Cathelicidin antimicrobial peptide                 | 0.00  | 0.00  | 0.00 | 0.00 | 0.00 |
| Tissue Leakage          | CD5 antigen-like                                   | 0.04  | 0.02  | 0.07 | 0.04 | 0.03 |
| Tissue Leakage          | Cell division cycle 5-like protein                 | 0.00  | 0.00  | 0.00 | 0.00 | 0.00 |
| Tissue Leakage          | Choriogonadotropin subunit beta                    | 0.00  | 0.78  | 0.00 | 0.00 | 0.00 |
| Tissue Leakage          | Cofilin-1                                          | 0.00  | 0.00  | 0.00 | 0.00 | 0.00 |
| Tissue Leakage          | Complement C1q subcomponent subunit A              | 0.00  | 0.00  | 0.00 | 0.00 | 0.00 |
| Tissue Leakage          | Erythrocyte band 7 integral membrane               | 0.00  | 0.00  | 0.00 | 0.00 | 0.00 |

|                | protein                                              |      |      |      |      |      |
|----------------|------------------------------------------------------|------|------|------|------|------|
| Tissue Leakage | Fermitin family homolog 3                            | 0.00 | 0.00 | 0.00 | 0.00 | 0.00 |
| Tissue Leakage | Gelsolin                                             | 0.03 | 0.00 | 0.05 | 0.05 | 0.04 |
| Tissue Leakage | Glyceraldehyde-3-phosphate dehydrogenase             | 0.00 | 0.00 | 0.00 | 0.00 | 0.00 |
| Tissue Leakage | GTPase IMAP family member 7                          | 0.00 | 0.00 | 0.00 | 0.00 | 0.00 |
| Tissue Leakage | Hemoglobin subunit beta                              | 0.00 | 0.00 | 0.09 | 0.08 | 0.09 |
| Tissue Leakage | Heterogeneous nuclear ribonucleoprotein A3           | 0.00 | 0.00 | 0.00 | 0.00 | 0.00 |
| Tissue Leakage | Insulin-like growth factor-binding protein 4         | 0.00 | 0.00 | 0.00 | 0.00 | 0.00 |
| Tissue Leakage | Insulin-like growth factor-binding protein 5         | 0.00 | 0.00 | 0.00 | 0.00 | 0.00 |
| Tissue Leakage | Killer cell immunoglobulin-like receptor             | 0.00 | 0.00 | 0.00 | 0.00 | 0.00 |
| Tissue Leakage | Lactotransferrin                                     | 0.00 | 0.00 | 0.00 | 0.00 | 0.00 |
| Tissue Leakage | Microtubule-associated protein RP/EB family member 2 | 0.00 | 0.00 | 0.00 | 0.00 | 0.00 |
| Tissue Leakage | Multifunctional methyltransferase subunit            | 0.00 | 0.00 | 0.00 | 0.00 | 0.00 |
| Tissue Leakage | Peflin                                               | 0.00 | 0.00 | 0.00 | 0.00 | 0.00 |
| Tissue Leakage | Platelet factor 4                                    | 0.00 | 0.00 | 0.00 | 0.00 | 0.00 |
| Tissue Leakage | Probable ATP-dependent RNA helicase                  | 0.00 | 0.00 | 0.00 | 0.00 | 0.00 |
| Tissue Leakage | Profilin-1                                           | 0.00 | 0.00 | 0.00 | 0.00 | 0.00 |
| Tissue Leakage | Prolactin-inducible protein                          | 0.00 | 0.00 | 0.01 | 0.13 | 0.01 |
| Tissue Leakage | Proteoglycan 4                                       | 0.00 | 0.00 | 0.00 | 0.00 | 0.00 |
| Tissue Leakage | Putative UPF0607                                     | 0.00 | 0.00 | 0.00 | 0.00 | 0.00 |
| Tissue Leakage | Ras-related protein Rap-1A                           | 0.00 | 0.00 | 0.09 | 0.10 | 0.09 |
| Tissue Leakage | Ras-related protein Rap-1b                           | 0.00 | 0.00 | 0.00 | 0.00 | 0.00 |
| Tissue Leakage | rRNA methyltransferase 2, mitochondrial              | 0.00 | 0.00 | 0.00 | 0.00 | 0.00 |
| Tissue Leakage | Serine racemase                                      | 0.00 | 0.00 | 0.00 | 0.00 | 0.00 |
| Tissue Leakage | Serotransferrin                                      | 2.61 | 2.05 | 0.48 | 0.33 | 0.25 |
| Tissue Leakage | Serum amyloid A-2 protein                            | 0.00 | 0.00 | 0.00 | 0.00 | 0.00 |
| Tissue Leakage | Small integral membrane protein 7                    | 0.00 | 0.00 | 0.00 | 0.00 | 0.00 |
| Tissue Leakage | Tetranectin                                          | 0.00 | 0.00 | 0.00 | 0.00 | 0.00 |
| Tissue Leakage | Vitronectin                                          | 0.33 | 0.37 | 0.66 | 0.61 | 0.60 |
| Tissue Leakage | Zinc finger protein basonuclin-2                     | 0.00 | 0.00 | 0.69 | 0.67 | 0.78 |

**Table 8:** LC MS Analysis: All identified corona proteins associated with functionalized nanoparticles (PS-COOH and PS-NH<sub>2</sub>) after each purification step in comparison to human serum. Values are presented in % based on all identified proteins (in fmol).

| Annotation  | Description                 | PS-COOH  |          | PS-NH <sub>2</sub> |          |
|-------------|-----------------------------|----------|----------|--------------------|----------|
|             |                             | 1st Cent | 3rd Wash | 1st Cent           | 3rd Wash |
| Acute Phase | Alpha-1-acid glycoprotein 1 | 0.47     | 0.00     | 0.37               | 0.02     |
| Acute Phase | Alpha-1-acid glycoprotein 2 | 0.20     | 0.00     | 0.14               | 0.03     |
| Acute Phase | Alpha-1-antichymotrypsin    | 0.56     | 0.00     | 0.31               | 0.04     |
| Acute Phase | Alpha-2-macroglobulin       | 0.57     | 0.03     | 0.61               | 0.03     |
| Acute Phase | Ceruloplasmin               | 0.41     | 0.00     | 0.41               | 0.04     |
| Acute Phase | Fibronectin                 | 0.00     | 0.00     | 0.00               | 0.00     |

|                   |                                       |      |      |      |      |
|-------------------|---------------------------------------|------|------|------|------|
| Acute Phase       | Haptoglobin                           | 1.05 | 0.00 | 1.17 | 0.07 |
| Acute Phase       | Haptoglobin-related protein           | 0.16 | 0.00 | 0.18 | 0.04 |
| Acute Phase       | Lipopolysaccharide-binding protein    | 0.08 | 0.26 | 0.01 | 0.00 |
| Acute Phase       | Platelet basic protein                | 0.00 | 0.17 | 0.00 | 0.04 |
| Acute Phase       | Serum amyloid A-1 protein             | 0.00 | 0.04 | 0.00 | 0.01 |
| Acute Phase       | Serum amyloid P-component             | 0.56 | 1.37 | 0.58 | 0.92 |
| Coagulation       | Alpha-2-antiplasmin                   | 0.00 | 0.03 | 0.00 | 0.00 |
| Coagulation       | Antithrombin-III                      | 0.48 | 3.26 | 0.33 | 0.06 |
| Coagulation       | Carboxypeptidase B2                   | 0.00 | 0.13 | 0.00 | 0.01 |
| Coagulation       | Coagulation factor V                  | 0.00 | 0.17 | 0.00 | 0.09 |
| Coagulation       | Coagulation factor XI                 | 0.00 | 0.40 | 0.00 | 0.00 |
| Coagulation       | Fibrinogen alpha chain                | 0.00 | 0.00 | 0.00 | 0.01 |
| Coagulation       | Heparin cofactor 2                    | 0.00 | 0.04 | 0.00 | 0.00 |
| Coagulation       | Histidine-rich glycoprotein           | 0.00 | 0.02 | 0.00 | 0.00 |
| Coagulation       | Integrin alpha-IIb                    | 0.00 | 0.00 | 0.00 | 0.03 |
| Coagulation       | Integrin beta-3                       | 0.00 | 0.00 | 0.00 | 0.01 |
| Coagulation       | Plasma serine protease inhibitor      | 0.00 | 0.18 | 0.00 | 0.00 |
| Coagulation       | Plasminogen                           | 0.42 | 0.45 | 0.70 | 0.00 |
| Coagulation       | Platelet factor 4                     | 0.00 | 2.27 | 0.00 | 0.00 |
| Coagulation       | Prothrombin                           | 0.75 | 2.81 | 0.37 | 0.10 |
| Complement system | C4b-binding protein alpha chain       | 0.10 | 0.00 | 0.09 | 0.06 |
| Complement system | Calmodulin-like protein 5             | 0.00 | 0.24 | 0.00 | 0.00 |
| Complement system | Complement C1q subcomponent subunit B | 0.00 | 0.26 | 0.00 | 0.16 |
| Complement system | Complement C1q subcomponent subunit C | 0.00 | 0.27 | 0.00 | 0.36 |
| Complement system | Complement C1r subcomponent           | 0.00 | 0.12 | 0.00 | 0.10 |
| Complement system | Complement C1s subcomponent           | 0.00 | 0.12 | 0.00 | 0.09 |
| Complement system | Complement C3                         | 0.65 | 0.29 | 0.55 | 0.28 |
| Complement system | Complement C4-A                       | 0.00 | 0.00 | 0.00 | 0.11 |
| Complement system | Complement C4-A                       | 0.00 | 0.61 | 0.00 | 0.00 |
| Complement system | Complement C4-B                       | 0.00 | 0.00 | 0.00 | 0.02 |
| Complement system | Complement C4-B                       | 4.91 | 0.00 | 4.77 | 0.00 |
| Complement system | Complement C5                         | 0.00 | 0.00 | 0.00 | 0.04 |
| Complement system | Complement component C6               | 0.00 | 0.00 | 0.00 | 0.01 |
| Complement system | Complement component C7               | 0.00 | 0.00 | 0.00 | 0.02 |
| Complement system | Complement component C8               | 0.00 | 0.02 | 0.00 | 0.00 |
| Complement system | Complement component C8 alpha chain   | 0.00 | 0.00 | 0.00 | 0.02 |
| Complement system | Complement component C8 gamma chain   | 0.00 | 0.02 | 0.00 | 0.03 |
| Complement        | Complement component C9               | 0.00 | 0.04 | 0.00 | 0.27 |

|                   |                                         |      |       |      |       |
|-------------------|-----------------------------------------|------|-------|------|-------|
| system            |                                         |      |       |      |       |
| Complement system | Complement factor B                     | 0.13 | 0.00  | 0.11 | 0.00  |
| Complement system | Complement factor H                     | 0.26 | 0.19  | 0.20 | 0.14  |
| Complement system | Complement factor H-related protein 1   | 0.00 | 0.15  | 0.00 | 0.02  |
| Complement system | Complement factor H-related protein 5   | 0.00 | 0.09  | 0.00 | 0.02  |
| Complement system | Ig lambda chain V-I                     | 0.00 | 0.00  | 0.00 | 0.20  |
| Complement system | Mannan-binding lectin serine protease 1 | 0.50 | 0.00  | 1.02 | 0.00  |
| Complement system | Plasma protease C1 inhibitor            | 0.17 | 0.08  | 0.12 | 0.07  |
| Complement system | Properdin                               | 0.00 | 0.08  | 0.00 | 0.20  |
| Immunoglobulins   | Ig alpha-1 chain C                      | 0.63 | 0.09  | 0.67 | 0.17  |
| Immunoglobulins   | Ig alpha-2 chain C                      | 0.04 | 0.00  | 0.04 | 0.02  |
| Immunoglobulins   | Ig delta chain C                        | 0.00 | 0.00  | 0.00 | 0.01  |
| Immunoglobulins   | Ig gamma-1 chain C                      | 5.40 | 23.51 | 5.37 | 26.76 |
| Immunoglobulins   | Ig gamma-2 chain C                      | 1.11 | 2.63  | 1.14 | 3.22  |
| Immunoglobulins   | Ig gamma-3 chain C                      | 0.43 | 3.10  | 0.43 | 3.04  |
| Immunoglobulins   | Ig gamma-4 chain C                      | 0.32 | 0.14  | 0.31 | 0.21  |
| Immunoglobulins   | Ig gamma-4 chain C                      | 0.00 | 0.13  | 0.00 | 0.00  |
| Immunoglobulins   | Ig heavy chain V-I                      | 0.00 | 0.01  | 0.00 | 0.02  |
| Immunoglobulins   | Ig heavy chain V-I                      | 0.00 | 0.13  | 0.00 | 0.15  |
| Immunoglobulins   | Ig heavy chain V-I                      | 0.00 | 0.11  | 0.00 | 0.11  |
| Immunoglobulins   | Ig heavy chain V-II                     | 0.00 | 0.18  | 0.00 | 0.08  |
| Immunoglobulins   | Ig heavy chain V-II                     | 0.00 | 0.01  | 0.00 | 0.02  |
| Immunoglobulins   | Ig heavy chain V-II                     | 0.00 | 0.07  | 0.00 | 0.00  |
| Immunoglobulins   | Ig heavy chain V-II                     | 0.00 | 0.00  | 0.00 | 0.02  |
| Immunoglobulins   | Ig heavy chain V-II                     | 0.04 | 0.00  | 0.04 | 0.00  |
| Immunoglobulins   | Ig heavy chain V-III                    | 0.35 | 1.52  | 0.33 | 1.78  |
| Immunoglobulins   | Ig kappa chain C                        | 6.43 | 21.24 | 5.98 | 22.01 |
| Immunoglobulins   | Ig kappa chain V-II                     | 0.03 | 0.00  | 0.02 | 0.02  |
| Immunoglobulins   | Ig kappa chain V-II                     | 0.00 | 0.01  | 0.00 | 0.00  |
| Immunoglobulins   | Ig kappa chain V-II                     | 0.00 | 0.00  | 0.00 | 0.00  |
| Immunoglobulins   | Ig kappa chain V-II                     | 0.00 | 0.00  | 0.00 | 0.39  |
| Immunoglobulins   | Ig kappa chain V-II                     | 0.00 | 0.03  | 0.00 | 0.13  |
| Immunoglobulins   | Ig kappa chain V-II                     | 0.00 | 0.00  | 0.00 | 0.00  |
| Immunoglobulins   | Ig kappa chain V-III 1                  | 0.33 | 0.55  | 0.27 | 1.28  |
| Immunoglobulins   | Ig kappa chain V-IV                     | 0.10 | 0.33  | 0.11 | 0.00  |
| Immunoglobulins   | Ig kappa chain V-IV                     | 0.00 | 0.00  | 0.00 | 0.38  |
| Immunoglobulins   | Ig kappa chain V-IV                     | 0.00 | 0.00  | 0.00 | 0.03  |
| Immunoglobulins   | Ig kappa chain V-IV                     | 0.00 | 0.00  | 0.00 | 0.00  |
| Immunoglobulins   | Ig kappa chain V-IV                     | 0.00 | 0.00  | 0.00 | 0.00  |
| Immunoglobulins   | Ig kappa chain V-IV                     | 0.00 | 0.00  | 0.00 | 0.00  |
| Immunoglobulins   | Ig lambda chain V-I                     | 0.00 | 0.02  | 0.00 | 0.00  |
| Immunoglobulins   | Ig lambda chain V-I                     | 0.00 | 0.00  | 0.00 | 0.04  |



|                         |                                              |      |      |      |       |
|-------------------------|----------------------------------------------|------|------|------|-------|
| Immunoglobulins         | Ig lambda chain V-II                         | 0.00 | 0.03 | 0.00 | 0.00  |
| Immunoglobulins         | Ig lambda chain V-III                        | 0.00 | 0.00 | 0.00 | 0.14  |
| Immunoglobulins         | Ig lambda chain V-III                        | 0.00 | 0.07 | 0.00 | 0.08  |
| Immunoglobulins         | Ig lambda-2 chain C                          | 1.45 | 0.00 | 1.32 | 0.00  |
| Immunoglobulins         | Ig lambda-3 chain C                          | 0.00 | 0.00 | 0.00 | 0.00  |
| Immunoglobulins         | Ig lambda-7 chain C                          | 0.00 | 0.01 | 0.00 | 0.01  |
| Immunoglobulins         | Ig mu chain C                                | 0.00 | 0.38 | 0.00 | 0.00  |
| Immunoglobulins         | Ig mu chain C region                         | 0.98 | 0.00 | 0.98 | 1.16  |
| Immunoglobulins         | Ig mu heavy chain disease protein            | 0.00 | 0.01 | 0.00 | 0.00  |
| Immunoglobulins         | Immunoglobulin J                             | 0.00 | 0.03 | 0.00 | 0.00  |
| Immunoglobulins         | Immunoglobulin J                             | 0.00 | 0.03 | 0.00 | 0.05  |
| Immunoglobulins         | Immunoglobulin lambda-like polypeptide 5     | 0.40 | 1.70 | 0.38 | 1.65  |
| Immunoglobulins         | Plasma kallikrein                            | 1.21 | 0.20 | 1.38 | 0.00  |
| Lipoproteins            | Apolipoprotein A-I                           | 2.02 | 3.28 | 2.46 | 8.58  |
| Lipoproteins            | Apolipoprotein A-II                          |      | 0.00 | 0.00 | 0.07  |
| Lipoproteins            | Apolipoprotein A-IV                          | 0.48 | 0.02 | 0.68 | 0.31  |
| Lipoproteins            | Apolipoprotein A-V                           | 0.00 | 0.00 | 0.00 | 0.02  |
| Lipoproteins            | Apolipoprotein B-100                         | 1.01 | 0.14 | 1.00 | 0.11  |
| Lipoproteins            | Apolipoprotein C-II                          | 0.00 | 0.00 | 0.00 | 0.04  |
| Lipoproteins            | Apolipoprotein C-III                         | 0.00 | 0.26 | 0.00 | 0.85  |
| Lipoproteins            | Apolipoprotein C-IV                          | 0.00 | 0.06 | 0.00 | 0.01  |
| Lipoproteins            | Apolipoprotein D                             | 0.00 | 0.00 | 0.00 | 0.04  |
| Lipoproteins            | Apolipoprotein E                             | 0.16 | 2.94 | 0.07 | 0.56  |
| Lipoproteins            | Apolipoprotein L1                            | 0.00 | 0.00 | 0.00 | 0.03  |
| Lipoproteins            | Apolipoprotein M                             | 0.00 | 0.00 | 0.00 | 0.02  |
| Lipoproteins            | Beta-2-glycoprotein 1                        | 0.73 | 2.72 | 0.21 | 0.05  |
| Lipoproteins            | Clusterin                                    | 0.35 | 2.09 | 1.34 | 13.76 |
| Lipoproteins            | Phospholipid transfer protein                | 0.00 | 0.00 | 0.00 | 0.05  |
| Lipoproteins            | Serum paraoxonase/arylesterase 1             | 0.00 | 0.00 | 0.00 | 0.02  |
| Other Plasma components | Actin, cytoplasmic 1                         | 0.00 | 0.00 | 0.00 | 0.04  |
| Other Plasma components | Actin, gamma-enteric smooth muscle           | 0.00 | 0.00 | 0.00 | 0.03  |
| Other Plasma components | Alpha-1-antitrypsin                          | 0.77 | 0.03 | 0.91 | 0.05  |
| Other Plasma components | Alpha-1B-glycoprotein                        | 0.11 | 0.00 | 0.10 | 0.00  |
| Other Plasma components | Alpha-2-HS-glycoprotein                      | 0.22 | 0.00 | 0.20 | 0.00  |
| Other Plasma components | Angiotensinogen                              | 0.20 | 0.00 | 0.21 | 0.00  |
| Other Plasma components | Annexin A2                                   | 0.00 | 0.08 | 0.00 | 0.00  |
| Other Plasma components | AP-1 complex subunit sigma-2                 | 0.00 | 0.00 | 0.00 | 0.01  |
| Other Plasma components | Bone morphogenetic protein 8B                | 0.00 | 0.00 | 0.00 | 0.00  |
| Other Plasma components | BPI fold-containing family A member 1        | 0.00 | 0.00 | 0.00 | 0.00  |
| Other Plasma components | Brain and acute leukemia cytoplasmic protein | 0.00 | 0.00 | 0.00 | 0.01  |
| Other Plasma components | BTB/POZ domain-containing protein            | 0.00 | 0.00 | 0.00 | 0.00  |



|                         |                                                                        |      |      |      |      |
|-------------------------|------------------------------------------------------------------------|------|------|------|------|
| components              |                                                                        |      |      |      |      |
| Other Plasma components | Calcium-transporting ATPase type 2C member 2                           | 0.07 | 0.00 | 0.07 | 0.00 |
| Other Plasma components | Carbonyl reductase [NADPH] 1                                           | 2.70 | 0.00 | 3.17 | 0.00 |
| Other Plasma components | Caspase-14                                                             | 0.00 | 0.01 | 0.00 | 0.00 |
| Other Plasma components | Cofilin-2                                                              | 0.00 | 0.00 | 0.00 | 0.00 |
| Other Plasma components | Cytohesin-1                                                            | 0.00 | 0.00 | 0.00 | 0.00 |
| Other Plasma components | DnaJ homolog subfamily B member 4                                      | 0.00 | 0.04 | 0.00 | 0.00 |
| Other Plasma components | E3 SUMO-protein ligase PIAS3                                           | 0.31 | 0.00 | 0.20 | 0.00 |
| Other Plasma components | Eukaryotic translation initiation factor 1b                            | 0.00 | 0.00 | 0.00 | 0.00 |
| Other Plasma components | F-actin-capping protein subunit alpha-2                                | 0.00 | 0.00 | 0.00 | 0.00 |
| Other Plasma components | Frataxin, mitochondrial                                                | 0.00 | 0.00 | 0.00 | 0.00 |
| Other Plasma components | Ganglioside-induced differentiation-associated protein 1-like 1        | 0.04 | 0.00 | 0.04 | 0.00 |
| Other Plasma components | Glutathione peroxidase 3                                               | 0.00 | 0.00 | 0.00 | 0.02 |
| Other Plasma components | Hemoglobin subunit beta                                                | 0.00 | 0.00 | 0.00 | 0.05 |
| Other Plasma components | Hemoglobin subunit beta                                                | 0.03 | 0.00 | 0.04 | 0.00 |
| Other Plasma components | Hemoglobin subunit delta                                               | 0.00 | 0.00 | 0.00 | 0.01 |
| Other Plasma components | Hemoglobin subunit gamma-2                                             | 0.00 | 0.00 | 0.00 | 0.01 |
| Other Plasma components | Hemopexin                                                              | 0.00 | 0.01 | 0.00 | 0.00 |
| Other Plasma components | Hemopexin                                                              | 0.93 | 0.01 | 0.81 | 0.03 |
| Other Plasma components | Homeobox protein Meis1                                                 | 0.00 | 0.01 | 0.00 | 0.00 |
| Other Plasma components | Inactive ubiquitin carboxyl-terminal hydrolase 17-like protein 7       | 0.00 | 0.00 | 0.00 | 0.04 |
| Other Plasma components | Insulin-like growth factor-binding protein complex acid labile subunit | 0.00 | 0.00 | 0.00 | 0.01 |
| Other Plasma components | Inter-alpha-trypsin inhibitor heavy chain H1                           | 1.27 | 0.00 | 0.57 | 0.00 |
| Other Plasma components | Inter-alpha-trypsin inhibitor heavy chain H2                           | 0.28 | 0.00 | 0.38 | 0.00 |
| Other Plasma components | Inter-alpha-trypsin inhibitor heavy chain H4                           | 0.36 | 1.98 | 0.15 | 0.04 |
| Other Plasma components | Keratin                                                                | 1.74 | 1.54 | 1.51 | 2.03 |
| Other Plasma components | LIM domain only protein 3                                              | 0.06 | 0.00 | 0.01 | 0.00 |
| Other Plasma components | L-lactate dehydrogenase C                                              | 0.72 | 0.00 | 1.03 | 0.00 |
| Other Plasma components | Lysozyme C                                                             | 0.00 | 0.05 | 0.00 | 0.00 |
| Other Plasma components | Microtubule-associated protein RP/EB family member 3                   | 0.60 | 0.00 | 0.56 | 0.00 |
| Other Plasma components | Multimerin-1                                                           | 0.00 | 0.05 | 0.00 | 0.00 |

|                         |                                                        |       |      |       |      |
|-------------------------|--------------------------------------------------------|-------|------|-------|------|
| Other Plasma components | Myb/SANT-like DNA-binding domain-containing protein 4  | 0.00  | 0.04 | 0.00  | 0.00 |
| Other Plasma components | Neuroblastoma breakpoint family member 4               | 0.00  | 0.00 | 0.00  | 0.00 |
| Other Plasma components | Neutrophil gelatinase-associated lipocalin             | 0.00  | 0.01 | 0.00  | 0.00 |
| Other Plasma components | Oxidoreductase NAD-binding domain-containing protein 1 | 0.15  | 0.00 | 0.20  | 0.00 |
| Other Plasma components | Paired mesoderm homeobox protein 1                     | 0.00  | 0.00 | 0.00  | 0.00 |
| Other Plasma components | Pancreatic secretory trypsin inhibitor                 | 0.00  | 0.00 | 0.00  | 0.00 |
| Other Plasma components | Platelet factor 4 variant                              | 0.00  | 0.16 | 0.00  | 0.00 |
| Other Plasma components | Platelet glycoprotein 4                                | 0.00  | 0.00 | 0.00  | 0.01 |
| Other Plasma components | Pleckstrin                                             | 0.00  | 0.02 | 0.00  | 0.00 |
| Other Plasma components | Polymeric immunoglobulin receptor                      | 0.00  | 0.00 | 0.00  | 0.00 |
| Other Plasma components | POTE ankyrin domain family member E                    | 0.00  | 0.00 | 0.00  | 0.08 |
| Other Plasma components | Pregnancy zone protein                                 | 0.63  | 0.00 | 0.62  | 0.00 |
| Other Plasma components | Probable ribonuclease 11                               | 0.00  | 0.00 | 0.00  | 0.00 |
| Other Plasma components | Procollagen C-endopeptidase enhancer 1                 | 0.00  | 0.05 | 0.00  | 0.00 |
| Other Plasma components | Protein AMBP                                           | 0.08  | 0.10 | 0.07  | 0.00 |
| Other Plasma components | Protein Njmu-R1                                        | 0.61  | 0.00 | 0.58  | 0.00 |
| Other Plasma components | Protein slowmo homolog 1                               | 0.00  | 0.00 | 0.00  | 0.01 |
| Other Plasma components | Protein SSX9                                           | 0.00  | 0.00 | 0.00  | 0.00 |
| Other Plasma components | Putative annexin A2-like protein                       | 0.00  | 0.00 | 0.00  | 0.08 |
| Other Plasma components | Putative Polycomb group protein ASXL1                  | 0.00  | 0.00 | 0.00  | 0.05 |
| Other Plasma components | Ragulator complex protein                              | 0.00  | 0.00 | 0.00  | 0.00 |
| Other Plasma components | Reticulocalbin-3                                       | 0.00  | 0.00 | 0.00  | 0.01 |
| Other Plasma components | Retinol-binding protein 4                              | 0.04  | 0.00 | 0.04  | 0.00 |
| Other Plasma components | Ribonuclease 4                                         | 0.00  | 0.04 | 0.00  | 0.00 |
| Other Plasma components | RNA-binding protein Musashi homolog 1                  | 0.00  | 0.15 | 0.00  | 0.00 |
| Other Plasma components | Selenoprotein P                                        | 0.00  | 0.04 | 0.00  | 0.00 |
| Other Plasma components | Serotransferrin                                        | 0.00  | 0.09 | 0.00  | 0.00 |
| Other Plasma components | Serum albumin                                          | 47.74 | 0.69 | 49.31 | 1.31 |
| Other Plasma components | Sideroflexin-5                                         | 0.03  | 0.00 | 0.02  | 0.00 |
| Other Plasma components | Synapsin-1                                             | 0.01  | 0.00 | 0.01  | 0.00 |
| Other Plasma            | TRAF family member-associated NF-kappa-B               | 0.00  | 0.00 | 0.00  | 0.00 |

|                         |                                                      |      |      |      |      |
|-------------------------|------------------------------------------------------|------|------|------|------|
| components              | activator                                            |      |      |      |      |
| Other Plasma components | Transgelin-2                                         | 0.00 | 0.00 | 0.00 | 0.01 |
| Other Plasma components | Transmembrane domain-containing protein              | 0.00 | 0.00 | 0.00 | 0.00 |
| Other Plasma components | Transmembrane protein 43                             | 0.17 | 0.00 | 0.13 | 0.00 |
| Other Plasma components | Transthyretin                                        | 0.25 | 0.05 | 0.24 | 0.05 |
| Other Plasma components | Ubiquitin-conjugating enzyme E2                      | 0.00 | 0.01 | 0.00 | 0.00 |
| Other Plasma components | Uncharacterized protein C10orf88                     | 0.00 | 0.00 | 0.00 | 0.03 |
| Other Plasma components | Uncharacterized protein C11orf70                     | 0.16 | 0.00 | 0.16 | 0.00 |
| Other Plasma components | Vitamin D-binding protein                            | 0.13 | 0.00 | 0.14 | 0.01 |
| Other Plasma components | Zinc-alpha-2-glycoprotein                            | 0.04 | 0.00 | 0.03 | 0.00 |
| Other Plasma components | Zymogen granule protein 16 homolog B                 | 0.00 | 0.00 | 0.00 | 0.00 |
| Tissue Leakage          | 14-3-3 protein zeta/delta                            | 0.00 | 0.00 | 0.00 | 0.00 |
| Tissue Leakage          | ADP-ribosylation factor 1                            | 0.00 | 0.00 | 0.00 | 0.02 |
| Tissue Leakage          | ADP-ribosylation factor 3                            | 0.00 | 0.01 | 0.00 | 0.00 |
| Tissue Leakage          | ADP-ribosylation factor 5                            | 0.00 | 0.00 | 0.00 | 0.00 |
| Tissue Leakage          | Angiogenin                                           | 0.00 | 0.42 | 0.00 | 0.00 |
| Tissue Leakage          | Calcineurin subunit B type 1                         | 0.00 | 0.00 | 0.00 | 0.00 |
| Tissue Leakage          | Cathelicidin antimicrobial peptide                   | 0.00 | 0.05 | 0.00 | 0.00 |
| Tissue Leakage          | CD5 antigen-like                                     | 0.00 | 0.03 | 0.00 | 0.11 |
| Tissue Leakage          | Cell division cycle 5-like protein                   | 0.00 | 0.11 | 0.00 | 0.00 |
| Tissue Leakage          | Choriogonadotropin subunit beta                      | 0.00 | 0.00 | 0.00 | 0.00 |
| Tissue Leakage          | Cofilin-1                                            | 0.00 | 0.03 | 0.00 | 0.00 |
| Tissue Leakage          | Complement C1q subcomponent subunit A                | 0.00 | 0.10 | 0.00 | 0.07 |
| Tissue Leakage          | Erythrocyte band 7 integral membrane protein         | 0.05 | 0.00 | 0.04 | 0.02 |
| Tissue Leakage          | Fermitin family homolog 3                            | 0.00 | 0.04 | 0.00 | 0.00 |
| Tissue Leakage          | Gelsolin                                             | 0.00 | 0.47 | 0.00 | 0.11 |
| Tissue Leakage          | Glyceraldehyde-3-phosphate dehydrogenase             | 0.00 | 0.04 | 0.00 | 0.00 |
| Tissue Leakage          | GTPase IMAP family member 7                          | 0.00 | 0.00 | 0.00 | 0.01 |
| Tissue Leakage          | Hemoglobin subunit beta                              | 0.00 | 0.00 | 0.00 | 0.00 |
| Tissue Leakage          | Heterogeneous nuclear ribonucleoprotein A3           | 0.00 | 0.00 | 0.00 | 1.38 |
| Tissue Leakage          | Insulin-like growth factor-binding protein 4         | 0.00 | 0.03 | 0.00 | 0.00 |
| Tissue Leakage          | Insulin-like growth factor-binding protein 5         | 0.00 | 0.04 | 0.00 | 0.00 |
| Tissue Leakage          | Killer cell immunoglobulin-like receptor             | 0.00 | 0.00 | 0.00 | 0.01 |
| Tissue Leakage          | Lactotransferrin                                     | 0.00 | 0.37 | 0.00 | 0.00 |
| Tissue Leakage          | Microtubule-associated protein RP/EB family member 2 | 0.00 | 0.00 | 0.00 | 0.01 |
| Tissue Leakage          | Multifunctional methyltransferase subunit            | 0.00 | 0.00 | 0.00 | 0.09 |
| Tissue Leakage          | Peflin                                               | 0.00 | 0.00 | 0.00 | 1.20 |
| Tissue Leakage          | Platelet factor 4                                    | 0.21 | 0.00 | 0.01 | 0.06 |
| Tissue Leakage          | Probable ATP-dependent RNA helicase                  | 0.00 | 0.00 | 0.00 | 0.22 |
| Tissue Leakage          | Profilin-1                                           | 0.00 | 0.00 | 0.00 | 0.01 |
| Tissue Leakage          | Prolactin-inducible protein                          | 0.00 | 0.00 | 0.00 | 0.00 |

|                |                                         |      |       |      |      |
|----------------|-----------------------------------------|------|-------|------|------|
| Tissue Leakage | Proteoglycan 4                          | 0.00 | 0.13  | 0.00 | 0.00 |
| Tissue Leakage | Putative UPF0607                        | 0.00 | 0.05  | 0.00 | 0.00 |
| Tissue Leakage | Ras-related protein Rap-1A              | 0.00 | 0.01  | 0.00 | 0.00 |
| Tissue Leakage | Ras-related protein Rap-1b              | 0.00 | 0.00  | 0.00 | 0.06 |
| Tissue Leakage | rRNA methyltransferase 2, mitochondrial | 0.00 | 0.00  | 0.00 | 0.07 |
| Tissue Leakage | Serine racemase                         | 0.00 | 0.00  | 0.00 | 0.00 |
| Tissue Leakage | Serotransferrin                         | 1.66 | 0.09  | 1.47 | 0.18 |
| Tissue Leakage | Serum amyloid A-2 protein               | 0.00 | 0.00  | 0.00 | 0.00 |
| Tissue Leakage | Small integral membrane protein 7       | 0.00 | 0.00  | 0.00 | 0.01 |
| Tissue Leakage | Tetranectin                             | 0.00 | 0.00  | 0.00 | 0.00 |
| Tissue Leakage | Vitronectin                             | 1.18 | 10.73 | 0.36 | 0.36 |
| Tissue Leakage | Zinc finger protein basophilin-2        | 0.00 | 0.00  | 0.00 | 0.68 |

## Literature

1. Rausch, K.; Reuter, A.; Fischer, K.; Schmidt, M., Evaluation of nanoparticle aggregation in human blood serum. *Biomacromolecules* **2010**, *11* (11).
2. Renz, P.; Kokkinopoulou, M.; Landfester, K.; Lieberwirth, I., Imaging of Polymeric Nanoparticles: Hard Challenge for Soft Objects. *Macromolecular Chemistry and Physics* **2016**, *217* (71), 1879–1885.
3. Kremer, J. R.; Mastronarde, D. N.; McIntosh, J. R., Computer visualization of three-dimensional image data using IMOD. *J Struct Biol.* **1996**, *116* (1), 71-76.
4. Musyanovych, A.; Rossmann, R.; Tontsch, C.; Landfester, K., Effect of hydrophilic comonomer and surfactant type on the colloidal stability and size distribution of carboxyl- and amino-functionalized polystyrene particles prepared by miniemulsion polymerization. *Langmuir*. **2007**, *23* (10), 5367-76.
5. Walczyk, D.; Baldelli Bombelli, F.; Monopoli, M. P.; Lynch, I.; Dawson, K. A., What the cell 'sees' in bionanoscience. *J. Am. Chem. Soc.* **2010**, *132*, 5761-5768.
6. Hofmann, D.; Tenzer, S.; Bannwarth, M. B.; Messerschmidt, C.; Glaser, S.-F.; Schild, H.; Landfester, K.; Mailänder, V., Mass Spectrometry and Imaging Analysis of Nanoparticle-Containing Vesicles Provide a Mechanistic Insight into Cellular Trafficking. *ACS Nano* **2014**, *8* (10), 10077-10088.
7. Tenzer, S., Nanoparticle size is a critical physicochemical determinant of the human blood plasma corona: a comprehensive quantitative proteomic analysis. *ACS Nano* **2011**, *5*, 7155-7167.
8. Bradshaw, R. A.; Burlingame, A. L.; Carr, S.; Aebersold, R., Reporting protein identification data: the next generation of guidelines. *Mol Cell Proteomics* **2006**, *5* (5), 787-8.
9. Silva, J. C.; Gorenstein, M. V.; Li, G. Z.; Vissers, J. P. C.; Geromanos, S. J., Absolute quantification of proteins by LCMSE: a virtue of parallel MS acquisition. *Mol. Cell. Proteomics* **2006**, *5*, 144-156.
10. García-Moreno, I.; Costela, A.; Campo, L., 8-Phenyl-Substituted Dipyrromethene-BF<sub>2</sub> Complexes as Highly Efficient and Photostable Laser Dyes. *J. Phys. Chem. A* **2004**, *108* (16), 3315-3323.
11. Landfester, K., Synthesis of colloidal particles in miniemulsions. *Annual Review of Materials Research* **2006**, *36* (1), 231-279.
